# Supplementary material
Source: publisher figshare collection journal article supplement (https://gsajournals.figshare.com/ndownloader/files/14676746)
Supplement: Supplementary file 1 [file 14676746]

Experiment	Rep	Range	Pass	Year	Pedigree	GossRating1	GossRating2	GossRating3	DisArea
GossWiltAssocMap	1	2	3	2014	B76	2	2	2	2
GossWiltAssocMap	1	2	5	2014	NY6371	3	4	4	3.75
GossWiltAssocMap	1	2	7	2014	OC14	1	2	2	1.75
GossWiltAssocMap	1	2	9	2014	CI90C	1	1	1	1
GossWiltAssocMap	1	2	11	2014	W 3647	1	2	3	2
GossWiltAssocMap	1	2	13	2014	H121	1	1	2	1.25
GossWiltAssocMap	1	2	15	2014	FR19	4	4	5	4.25
GossWiltAssocMap	1	2	17	2014	OC8	2	2	3	2.25
GossWiltAssocMap	1	2	19	2014	H95	1	2	2	1.75
GossWiltAssocMap	1	2	21	2014	MS226	3	3	3	3
GossWiltAssocMap	1	2	23	2014	N192	3	4	5	4
GossWiltAssocMap	1	2	25	2014	WXI198	2	3	3	2.75
GossWiltAssocMap	1	2	27	2014	PHJ31	1	1	1	1
GossWiltAssocMap	1	2	29	2014	SA24	1	2	2	1.75
GossWiltAssocMap	1	2	31	2014	PHK29	1	1	1	1
GossWiltAssocMap	1	2	33	2014	B116	1	1	1	1
GossWiltAssocMap	1	2	35	2014	CH157	3	3	3	3
GossWiltAssocMap	1	2	37	2014	CH711-10	1	2	4	2.25
GossWiltAssocMap	1	2	39	2014	NO. 1068 INBRED	4	5	6	5
GossWiltAssocMap	1	3	3	2014	794	2	3	3	2.75
GossWiltAssocMap	1	3	5	2014	K150	4	4	4	4
GossWiltAssocMap	1	3	7	2014	OS420	1	2	2	1.75
GossWiltAssocMap	1	3	9	2014	LH123HT	2	2	2	2
GossWiltAssocMap	1	3	11	2014	A548	1	2	3	2
GossWiltAssocMap	1	3	13	2014	B109	2	2	2	2
GossWiltAssocMap	1	3	15	2014	MO512BW	1	2	3	2
GossWiltAssocMap	1	3	17	2014	B87	4	4	4	4
GossWiltAssocMap	1	3	19	2014	B88	1	1	1	1
GossWiltAssocMap	1	3	21	2014	R906	2	2	2	2
GossWiltAssocMap	1	3	23	2014	LH119	1	2	2	1.75
GossWiltAssocMap	1	3	25	2014	B79	2	2	2	2
GossWiltAssocMap	1	3	27	2014	R181B	5	5	6	5.25
GossWiltAssocMap	1	3	29	2014	B14A	2	3	3	2.75
GossWiltAssocMap	1	3	31	2014	HP301	2	2	2	2
GossWiltAssocMap	1	3	33	2014	NC328	1	1	1	1
GossWiltAssocMap	1	3	35	2014	PA356	3	3	3	3
GossWiltAssocMap	1	3	37	2014	B91	1	1	1	1
GossWiltAssocMap	1	3	39	2014	HB8229	3	3	3	3
GossWiltAssocMap	1	4	3	2014	LH57	1	1	1	1
GossWiltAssocMap	1	4	5	2014	VA16	1	1	1	1
GossWiltAssocMap	1	4	7	2014	LH82	2	3	3	2.75
GossWiltAssocMap	1	4	9	2014	MO15W	1	1	1	1
GossWiltAssocMap	1	4	11	2014	A334	2	2	2	2
GossWiltAssocMap	1	4	13	2014	89S4125	2	2	2	2
GossWiltAssocMap	1	4	15	2014	LH193	1	1	2	1.25
GossWiltAssocMap	1	4	17	2014	LH220HT	3	3	3	3
GossWiltAssocMap	1	4	19	2014	A634	4	4	4	4
GossWiltAssocMap	1	4	21	2014	IDS91	2	2	2	2
GossWiltAssocMap	1	4	23	2014	A671	2	2	2	2
GossWiltAssocMap	1	4	25	2014	TX205	1	1	1	1
GossWiltAssocMap	1	4	27	2014	A357	1	1	1	1
GossWiltAssocMap	1	4	29	2014	B14A	2	3	3	2.75
GossWiltAssocMap	1	4	31	2014	IBB14	2	3	3	2.75
GossWiltAssocMap	1	4	33	2014	NY 428 (NEVEH YAAR)	2	2	3	2.25
GossWiltAssocMap	1	4	35	2014	A645	3	4	4	3.75
GossWiltAssocMap	1	4	37	2014	HY2	2	2	1	1.75
GossWiltAssocMap	1	4	39	2014	A208	2	3	NA	2.5
GossWiltAssocMap	1	5	3	2014	VA102	1	1	1	1
GossWiltAssocMap	1	5	5	2014	78002A	2	2	3	2.25
GossWiltAssocMap	1	5	7	2014	INBRED 309	4	5	6	5
GossWiltAssocMap	1	5	9	2014	4581 INBRED	1	1	1	1
GossWiltAssocMap	1	5	11	2014	P737M20	2	3	3	2.75
GossWiltAssocMap	1	5	13	2014	N516	2	2	2	2
GossWiltAssocMap	1	5	15	2014	PA871	2	2	2	2
GossWiltAssocMap	1	5	17	2014	PHK35	1	1	1	1
GossWiltAssocMap	1	5	19	2014	NC344	1	1	1	1
GossWiltAssocMap	1	5	21	2014	SD46	1	1	1	1
GossWiltAssocMap	1	5	23	2014	L	2	2	3	2.25
GossWiltAssocMap	1	5	25	2014	A239	2	3	3	2.75
GossWiltAssocMap	1	5	27	2014	ENG-LI CHIH	1	1	1	1
GossWiltAssocMap	1	5	29	2014	676A-348-68(B)	1	1	1	1
GossWiltAssocMap	1	5	31	2014	B41	1	2	2	1.75
GossWiltAssocMap	1	5	33	2014	N200	1	1	2	1.25
GossWiltAssocMap	1	5	35	2014	AUSTRCF 306350	4	4	4	4
GossWiltAssocMap	1	5	37	2014	H100	3	4	4	3.75
GossWiltAssocMap	1	5	39	2014	SD40	1	1	1	1
GossWiltAssocMap	1	6	3	2014	2 KM 368 INBRED	1	1	1	1
GossWiltAssocMap	1	6	5	2014	NC262	1	1	1	1
GossWiltAssocMap	1	6	7	2014	B14A	2	3	3	2.75
GossWiltAssocMap	1	6	9	2014	SD63	2	2	3	2.25
GossWiltAssocMap	1	6	11	2014	LH128	1	1	1	1
GossWiltAssocMap	1	6	13	2014	OS426	2	2	2	2
GossWiltAssocMap	1	6	15	2014	6M502	1	1	1	1
GossWiltAssocMap	1	6	17	2014	MS81	2	2	2	2
GossWiltAssocMap	1	6	19	2014	YING-55	3	4	5	4
GossWiltAssocMap	1	6	21	2014	A628	2	4	5	3.75
GossWiltAssocMap	1	6	23	2014	793	2	2	2	2
GossWiltAssocMap	1	6	25	2014	A635	3	4	4	3.75
GossWiltAssocMap	1	6	27	2014	PHK42	2	3	4	3
GossWiltAssocMap	1	6	29	2014	R907	2	3	3	2.75
GossWiltAssocMap	1	6	31	2014	AUSTRCF 306333	2	3	4	3
GossWiltAssocMap	1	6	33	2014	OC16	2	3	3	2.75
GossWiltAssocMap	1	6	35	2014	CO258	2	2	2	2
GossWiltAssocMap	1	6	37	2014	H99	1	1	1	1
GossWiltAssocMap	1	6	39	2014	K55	1	1	1	1
GossWiltAssocMap	1	7	3	2014	IA453	3	4	5	4
GossWiltAssocMap	1	7	5	2014	P51	2	4	7	4.25
GossWiltAssocMap	1	7	7	2014	AUSTRCF 306276	2	2	2	2
GossWiltAssocMap	1	7	9	2014	OC3	1	1	1	1
GossWiltAssocMap	1	7	11	2014	A14NW	2	3	4	3
GossWiltAssocMap	1	7	13	2014	PA468	3	3	3	3
GossWiltAssocMap	1	7	15	2014	N501	1	1	2	1.25
GossWiltAssocMap	1	7	17	2014	OH33	1	2	2	1.75
GossWiltAssocMap	1	7	19	2014	B14A	3	3	3	3
GossWiltAssocMap	1	7	21	2014	A632HT	4	4	4	4
GossWiltAssocMap	1	7	23	2014	A625	1	2	3	2
GossWiltAssocMap	1	7	25	2014	Q381	1	1	1	1
GossWiltAssocMap	1	7	27	2014	LH192	1	1	2	1.25
GossWiltAssocMap	1	7	29	2014	78004	2	3	3	2.75
GossWiltAssocMap	1	7	31	2014	N521	2	3	3	2.75
GossWiltAssocMap	1	7	33	2014	SD41	2	3	3	2.75
GossWiltAssocMap	1	7	35	2014	NO. 1049 INBRED	2	3	3	2.75
GossWiltAssocMap	1	7	37	2014	AUSTRCF 306238	2	3	3	2.75
GossWiltAssocMap	1	7	39	2014	52220	1	1	1	1
GossWiltAssocMap	1	8	3	2014	H84	2	2	2	2
GossWiltAssocMap	1	8	5	2014	HBA1	2	3	3	2.75
GossWiltAssocMap	1	8	7	2014	LH127	2	2	2	2
GossWiltAssocMap	1	8	9	2014	CI 20	1	1	1	1
GossWiltAssocMap	1	8	11	2014	90	3	3	3	3
GossWiltAssocMap	1	8	13	2014	GE54	2	2	1	1.75
GossWiltAssocMap	1	8	15	2014	PHW79	1	1	1	1
GossWiltAssocMap	1	8	17	2014	PHW52	1	1	1	1
GossWiltAssocMap	1	8	19	2014	PHN73	2	3	3	2.75
GossWiltAssocMap	1	8	21	2014	N551	1	1	1	1
GossWiltAssocMap	1	8	23	2014	PHZ51	2	2	2	2
GossWiltAssocMap	1	8	25	2014	LH205	1	1	1	1
GossWiltAssocMap	1	8	27	2014	N72-3-1-1 INBRED	1	1	2	1.25
GossWiltAssocMap	1	8	29	2014	MO46	1	1	1	1
GossWiltAssocMap	1	8	31	2014	MO17	1	1	1	1
GossWiltAssocMap	1	8	33	2014	A401	2	2	2	2
GossWiltAssocMap	1	8	35	2014	T62S	1	2	3	2
GossWiltAssocMap	1	8	37	2014	PHT60	1	1	1	1
GossWiltAssocMap	1	8	39	2014	B14A	3	3	3	3
GossWiltAssocMap	1	9	3	2014	A627	4	4	4	4
GossWiltAssocMap	1	9	5	2014	W64A	1	1	1	1
GossWiltAssocMap	1	9	7	2014	IA CG4189	1	2	3	2
GossWiltAssocMap	1	9	9	2014	MO42	1	2	3	2
GossWiltAssocMap	1	9	11	2014	WXB6	3	4	4	3.75
GossWiltAssocMap	1	9	13	2014	N524	1	1	1	1
GossWiltAssocMap	1	9	15	2014	B106	1	1	1	1
GossWiltAssocMap	1	9	17	2014	LH208	1	1	2	1.25
GossWiltAssocMap	1	9	19	2014	E8501	2	4	4	3.5
GossWiltAssocMap	1	9	21	2014	AUSTRCF 305836	1	1	1	1
GossWiltAssocMap	1	9	23	2014	CH705-8	2	3	4	3
GossWiltAssocMap	1	9	25	2014	MDF-13D	1	1	1	1
GossWiltAssocMap	1	9	27	2014	NC250	1	1	1	1
GossWiltAssocMap	1	9	29	2014	A619HT	2	2	2	2
GossWiltAssocMap	1	9	31	2014	(TWAN X TZUH)-S6	2	4	7	4.25
GossWiltAssocMap	1	9	33	2014	NC290A	1	1	1	1
GossWiltAssocMap	1	9	35	2014	PHW43	3	3	3	3
GossWiltAssocMap	1	9	37	2014	VA17	1	1	1	1
GossWiltAssocMap	1	9	39	2014	N502	3	3	3	3
GossWiltAssocMap	1	10	3	2014	T IEH 84	4	5	5	4.75
GossWiltAssocMap	1	10	5	2014	NC372	1	1	1	1
GossWiltAssocMap	1	10	7	2014	ND300	1	1	1	1
GossWiltAssocMap	1	10	9	2014	VA22	1	1	1	1
GossWiltAssocMap	1	10	11	2014	NC342	1	1	1	1
GossWiltAssocMap	1	10	13	2014	A258	1	3	3	2.5
GossWiltAssocMap	1	10	15	2014	PA877	1	1	1	1
GossWiltAssocMap	1	10	17	2014	B14A	2	3	3	2.75
GossWiltAssocMap	1	10	19	2014	A15-1 INBRED (POTCHEFSTROOM PEARL)	2	3	3	2.75
GossWiltAssocMap	1	10	21	2014	AUSTRCF 306239	1	1	1	1
GossWiltAssocMap	1	10	23	2014	PHN29	3	4	5	4
GossWiltAssocMap	1	10	25	2014	78010	1	2	2	1.75
GossWiltAssocMap	1	10	27	2014	R177	1	1	1	1
GossWiltAssocMap	1	10	29	2014	DE811	2	3	3	2.75
GossWiltAssocMap	1	10	31	2014	S8326	2	2	2	2
GossWiltAssocMap	1	10	33	2014	LH156	1	1	1	1
GossWiltAssocMap	1	10	35	2014	OH422	1	1	1	1
GossWiltAssocMap	1	10	37	2014	H8431	2	3	4	3
GossWiltAssocMap	1	10	39	2014	2FACC	2	2	2	2
GossWiltAssocMap	1	11	3	2014	LH145HT	3	4	6	4.25
GossWiltAssocMap	1	11	5	2014	PHM10	1	1	1	1
GossWiltAssocMap	1	11	7	2014	NYLB31	1	2	2	1.75
GossWiltAssocMap	1	11	9	2014	B14A	3	3	4	3.25
GossWiltAssocMap	1	11	11	2014	A663	2	3	4	3
GossWiltAssocMap	1	11	13	2014	LH59	1	1	1	1
GossWiltAssocMap	1	11	15	2014	DE1	2	2	1	1.75
GossWiltAssocMap	1	11	17	2014	LH51	1	1	1	1
GossWiltAssocMap	1	11	19	2014	MS57	1	1	1	1
GossWiltAssocMap	1	11	21	2014	A680	1	2	3	2
GossWiltAssocMap	1	11	23	2014	P39M96	1	2	3	2
GossWiltAssocMap	1	11	25	2014	W22	1	2	2	1.75
GossWiltAssocMap	1	11	27	2014	AUSTRCF 306306	3	3	3	3
GossWiltAssocMap	1	11	29	2014	R154	2	2	2	2
GossWiltAssocMap	1	11	31	2014	PHJ70	2	3	3	2.75
GossWiltAssocMap	1	11	33	2014	B46	2	3	3	2.75
GossWiltAssocMap	1	11	35	2014	R197	3	4	4	3.75
GossWiltAssocMap	1	11	37	2014	F2834T	1	1	1	1
GossWiltAssocMap	1	11	39	2014	H113	2	2	1	1.75
GossWiltAssocMap	1	12	3	2014	INBRED 34-1141	5	7	9	7
GossWiltAssocMap	1	12	5	2014	4676A	1	1	1	1
GossWiltAssocMap	1	12	7	2014	MS215	1	1	1	1
GossWiltAssocMap	1	12	9	2014	DAS3	1	1	1	1
GossWiltAssocMap	1	12	11	2014	OC12	2	2	3	2.25
GossWiltAssocMap	1	12	13	2014	N513	1	1	1	1
GossWiltAssocMap	1	12	15	2014	J8606	2	3	3	2.75
GossWiltAssocMap	1	12	17	2014	OC15	1	1	1	1
GossWiltAssocMap	1	12	19	2014	NC310	1	1	1	1
GossWiltAssocMap	1	12	21	2014	NO. 1037 INBRED	1	1	1	1
GossWiltAssocMap	1	12	23	2014	PHG83	1	1	1	1
GossWiltAssocMap	1	12	25	2014	OH43	1	2	2	1.75
GossWiltAssocMap	1	12	27	2014	T8	1	1	1	1
GossWiltAssocMap	1	12	29	2014	N543	2	2	2	2
GossWiltAssocMap	1	12	31	2014	IL778D	1	1	1	1
GossWiltAssocMap	1	12	33	2014	I29	2	3	3	2.75
GossWiltAssocMap	1	12	35	2014	A678	1	1	1	1
GossWiltAssocMap	1	12	37	2014	TX204	1	1	1	1
GossWiltAssocMap	1	12	39	2014	N530	3	3	3	3
GossWiltAssocMap	1	13	3	2014	IDS28	2	3	3	2.75
GossWiltAssocMap	1	13	5	2014	ABPL 2	1	2	NA	1.5
GossWiltAssocMap	1	13	7	2014	C410-1(F11) INBRED (HOTNOT CROSSES)	2	3	4	3
GossWiltAssocMap	1	13	9	2014	OC7	3	4	4	3.75
GossWiltAssocMap	1	13	11	2014	IA 61	2	3	3	2.75
GossWiltAssocMap	1	13	13	2014	PA875	1	1	1	1
GossWiltAssocMap	1	13	15	2014	B85	1	2	2	1.75
GossWiltAssocMap	1	13	17	2014	MS214	1	1	1	1
GossWiltAssocMap	1	13	19	2014	W572	2	3	3	2.75
GossWiltAssocMap	1	13	21	2014	CI 72	2	3	3	2.75
GossWiltAssocMap	1	13	23	2014	MS223	1	2	2	1.75
GossWiltAssocMap	1	13	25	2014	B97	1	2	2	1.75
GossWiltAssocMap	1	13	27	2014	PHT22	2	3	3	2.75
GossWiltAssocMap	1	13	29	2014	PA405	2	2	2	2
GossWiltAssocMap	1	13	31	2014	B14A	2	4	4	3.5
GossWiltAssocMap	1	13	33	2014	B108	2	4	5	3.75
GossWiltAssocMap	1	13	35	2014	MS100	3	5	5	4.5
GossWiltAssocMap	1	13	37	2014	IA DS 53	3	4	5	4
GossWiltAssocMap	1	13	39	2014	N6	2	2	2	2
GossWiltAssocMap	1	14	3	2014	MS24	3	4	6	4.25
GossWiltAssocMap	1	14	5	2014	OH56A	1	2	3	2
GossWiltAssocMap	1	14	7	2014	GT119	1	1	1	1
GossWiltAssocMap	1	14	9	2014	A656	2	3	3	2.75
GossWiltAssocMap	1	14	11	2014	B67	2	2	2	2
GossWiltAssocMap	1	14	13	2014	OC10	1	2	2	1.75
GossWiltAssocMap	1	14	15	2014	T242	2	3	3	2.75
GossWiltAssocMap	1	14	17	2014	790	1	2	NA	1.5
GossWiltAssocMap	1	14	19	2014	WX33-16	2	2	2	2
GossWiltAssocMap	1	14	21	2014	B57	2	3	3	2.75
GossWiltAssocMap	1	14	23	2014	N216	2	3	3	2.75
GossWiltAssocMap	1	14	25	2014	A251	1	1	1	1
GossWiltAssocMap	1	14	27	2014	B14A	2	3	3	2.75
GossWiltAssocMap	1	14	29	2014	LH60	1	1	1	1
GossWiltAssocMap	1	14	31	2014	MS221	2	2	2	2
GossWiltAssocMap	1	14	33	2014	R192	1	1	1	1
GossWiltAssocMap	1	14	35	2014	NC232	2	3	3	2.75
GossWiltAssocMap	1	14	37	2014	DAS1	2	3	4	3
GossWiltAssocMap	1	14	39	2014	MS80	2	2	3	2.25
GossWiltAssocMap	1	15	3	2014	NC278	1	1	1	1
GossWiltAssocMap	1	15	5	2014	N523	1	1	1	1
GossWiltAssocMap	1	15	7	2014	CO256	2	2	2	2
GossWiltAssocMap	1	15	9	2014	MBPM	1	1	1	1
GossWiltAssocMap	1	15	11	2014	B73HT	2	2	2	2
GossWiltAssocMap	1	15	13	2014	FBHJ	2	2	2	2
GossWiltAssocMap	1	15	15	2014	PA762	2	2	2	2
GossWiltAssocMap	1	15	17	2014	A295	2	2	2	2
GossWiltAssocMap	1	15	19	2014	N7A	2	4	5	3.75
GossWiltAssocMap	1	15	21	2014	PHB47	1	1	1	1
GossWiltAssocMap	1	15	23	2014	STRAIN 465A-421-68(B)	1	2	2	1.75
GossWiltAssocMap	1	15	25	2014	MS203	1	2	2	1.75
GossWiltAssocMap	1	15	27	2014	B47	1	1	1	1
GossWiltAssocMap	1	15	29	2014	A660	1	1	1	1
GossWiltAssocMap	1	15	31	2014	NO. 1266 INBRED	1	1	1	1
GossWiltAssocMap	1	15	33	2014	STRAIN 11D-586-68(A)	1	1	1	1
GossWiltAssocMap	1	15	35	2014	R221	2	3	3	2.75
GossWiltAssocMap	1	15	37	2014	PHR62	1	1	1	1
GossWiltAssocMap	1	15	39	2014	G80	1	1	1	1
GossWiltAssocMap	1	16	3	2014	MS132	NA	NA	NA	NA
GossWiltAssocMap	1	16	5	2014	B14A	3	4	4	3.75
GossWiltAssocMap	1	16	7	2014	89S4157	1	1	1	1
GossWiltAssocMap	1	16	9	2014	CI45	1	1	1	1
GossWiltAssocMap	1	16	11	2014	A166	2	3	4	3
GossWiltAssocMap	1	16	13	2014	B75	1	1	1	1
GossWiltAssocMap	1	16	15	2014	PHG86	2	2	3	2.25
GossWiltAssocMap	1	16	17	2014	MS116	1	1	1	1
GossWiltAssocMap	1	16	19	2014	H126W	1	1	1	1
GossWiltAssocMap	1	16	21	2014	VA52	1	2	2	1.75
GossWiltAssocMap	1	16	23	2014	TZU-CHIAO-HSI-WU 105	2	3	4	3
GossWiltAssocMap	1	16	25	2014	S 48	1	1	2	1.25
GossWiltAssocMap	1	16	27	2014	4F-342 CM 4	2	4	4	3.5
GossWiltAssocMap	1	16	29	2014	B105	1	2	2	1.75
GossWiltAssocMap	1	16	31	2014	MS224	1	1	1	1
GossWiltAssocMap	1	16	33	2014	H98	2	2	2	2
GossWiltAssocMap	1	16	35	2014	N801W	1	1	1	1
GossWiltAssocMap	1	16	37	2014	MO47	4	5	5	4.75
GossWiltAssocMap	1	16	39	2014	LH93	1	1	1	1
GossWiltAssocMap	1	17	3	2014	OH40B	1	1	1	1
GossWiltAssocMap	1	17	5	2014	DAS2	1	1	1	1
GossWiltAssocMap	1	17	7	2014	B7	1	1	1	1
GossWiltAssocMap	1	17	9	2014	K148	1	1	1	1
GossWiltAssocMap	1	17	11	2014	T8445 INBRED	1	1	1	1
GossWiltAssocMap	1	17	13	2014	764	1	1	1	1
GossWiltAssocMap	1	17	15	2014	H49	1	1	1	1
GossWiltAssocMap	1	17	17	2014	PHV78	1	1	1	1
GossWiltAssocMap	1	17	19	2014	MS72	2	3	4	3
GossWiltAssocMap	1	17	21	2014	B14A	2	3	3	2.75
GossWiltAssocMap	1	17	23	2014	H106W	1	1	1	1
GossWiltAssocMap	1	17	25	2014	R103	2	2	2	2
GossWiltAssocMap	1	17	27	2014	MO48	3	4	5	4
GossWiltAssocMap	1	17	29	2014	A632	3	4	5	4
GossWiltAssocMap	1	17	31	2014	VA35	1	1	1	1
GossWiltAssocMap	1	17	33	2014	N533	2	2	2	2
GossWiltAssocMap	1	17	35	2014	R168	1	1	1	1
GossWiltAssocMap	1	17	37	2014	B37	1	1	1	1
GossWiltAssocMap	1	17	39	2014	W 6462	2	2	2	2
GossWiltAssocMap	1	18	3	2014	WXK44	NA	NA	NA	NA
GossWiltAssocMap	1	18	5	2014	VA99	2	3	3	2.75
GossWiltAssocMap	1	18	7	2014	GT113	3	3	3	3
GossWiltAssocMap	1	18	9	2014	MS77	2	2	2	2
GossWiltAssocMap	1	18	11	2014	R159	2	3	3	2.75
GossWiltAssocMap	1	18	13	2014	LH38	2	2	2	2
GossWiltAssocMap	1	18	15	2014	PHW17	1	1	1	1
GossWiltAssocMap	1	18	17	2014	A643	1	2	1	1.5
GossWiltAssocMap	1	18	19	2014	CH732-12	2	3	4	3
GossWiltAssocMap	1	18	21	2014	W 3607	1	2	2	1.75
GossWiltAssocMap	1	18	23	2014	PHW65	1	1	1	1
GossWiltAssocMap	1	18	25	2014	B107	1	1	1	1
GossWiltAssocMap	1	18	27	2014	MS211	1	3	3	2.5
GossWiltAssocMap	1	18	29	2014	SG18	1	1	1	1
GossWiltAssocMap	1	18	31	2014	ND480	2	3	3	2.75
GossWiltAssocMap	1	18	33	2014	N199	1	1	1	1
GossWiltAssocMap	1	18	35	2014	H103	2	4	4	3.5
GossWiltAssocMap	1	18	37	2014	B14A	2	2	2	2
GossWiltAssocMap	1	18	39	2014	R2	3	3	4	3.25
GossWiltAssocMap	1	19	3	2014	NC260	1	1	1	1
GossWiltAssocMap	1	19	5	2014	OH84	NA	NA	NA	NA
GossWiltAssocMap	1	19	7	2014	PHG50	1	1	1	1
GossWiltAssocMap	1	19	9	2014	NC308	1	1	1	1
GossWiltAssocMap	1	19	11	2014	NS701	1	2	3	2
GossWiltAssocMap	1	19	13	2014	PA376	2	2	2	2
GossWiltAssocMap	1	19	15	2014	PHR36	2	2	3	2.25
GossWiltAssocMap	1	19	17	2014	PHM49	2	2	2	2
GossWiltAssocMap	1	19	19	2014	W8304	1	1	1	1
GossWiltAssocMap	1	19	21	2014	M14	1	1	1	1
GossWiltAssocMap	1	19	23	2014	SD102	1	1	1	1
GossWiltAssocMap	1	19	25	2014	A305	2	4	5	3.75
GossWiltAssocMap	1	19	27	2014	AUSTRCF 306336	1	1	2	1.25
GossWiltAssocMap	1	19	29	2014	N552	1	1	1	1
GossWiltAssocMap	1	19	31	2014	AUSTRCF 306348	2	3	4	3
GossWiltAssocMap	1	19	33	2014	N503	3	4	4	3.75
GossWiltAssocMap	1	19	35	2014	B164	2	2	2	2
GossWiltAssocMap	1	19	37	2014	PA778	1	2	2	1.75
GossWiltAssocMap	1	19	39	2014	VA18A	2	2	2	2
GossWiltAssocMap	1	20	3	2014	2369	NA	NA	NA	NA
GossWiltAssocMap	1	20	5	2014	PA91	1	1	1	1
GossWiltAssocMap	1	20	7	2014	89S4145	2	3	3	2.75
GossWiltAssocMap	1	20	9	2014	OC5	2	3	3	2.75
GossWiltAssocMap	1	20	11	2014	4F-259 HQ	2	3	3	2.75
GossWiltAssocMap	1	20	13	2014	PHG71	1	1	1	1
GossWiltAssocMap	1	20	15	2014	B14A	1	1	1	1
GossWiltAssocMap	1	20	17	2014	YONG 28	2	4	4	3.5
GossWiltAssocMap	1	20	19	2014	NC330	1	1	1	1
GossWiltAssocMap	1	20	21	2014	R71	2	4	4	3.5
GossWiltAssocMap	1	20	23	2014	A664	3	4	6	4.25
GossWiltAssocMap	1	20	25	2014	89S4083	2	3	3	2.75
GossWiltAssocMap	1	20	27	2014	H45	1	2	2	1.75
GossWiltAssocMap	1	20	29	2014	NO. 1201 INBRED	3	4	6	4.25
GossWiltAssocMap	1	20	31	2014	PHG35	1	1	1	1
GossWiltAssocMap	1	20	33	2014	5707	1	1	1	1
GossWiltAssocMap	1	20	35	2014	N509	1	1	2	1.25
GossWiltAssocMap	1	20	37	2014	C103	NA	NA	NA	NA
GossWiltAssocMap	1	20	39	2014	A659	2	4	5	3.75
GossWiltAssocMap	1	21	3	2014	BEI 10 = NORTH 10	2	3	3	2.75
GossWiltAssocMap	1	21	5	2014	EAST 028	1	2	3	2
GossWiltAssocMap	1	21	7	2014	PHT77	1	1	1	1
GossWiltAssocMap	1	21	9	2014	WF9	1	1	1	1
GossWiltAssocMap	1	21	11	2014	B14A	2	3	3	2.75
GossWiltAssocMap	1	21	13	2014	LH132	2	3	3	2.75
GossWiltAssocMap	1	21	15	2014	R4	1	1	1	1
GossWiltAssocMap	1	21	17	2014	A260	1	2	2	1.75
GossWiltAssocMap	1	21	19	2014	R113	1	1	1	1
GossWiltAssocMap	1	21	21	2014	A644	2	2	2	2
GossWiltAssocMap	1	21	23	2014	2MA22	2	2	2	2
GossWiltAssocMap	1	21	25	2014	78371A	1	1	1	1
GossWiltAssocMap	1	21	27	2014	MO402	1	1	2	1.25
GossWiltAssocMap	1	21	29	2014	VA26	2	2	2	2
GossWiltAssocMap	1	21	31	2014	LH1	2	2	2	2
GossWiltAssocMap	1	21	33	2014	H108	1	1	1	1
GossWiltAssocMap	1	21	35	2014	LH39	2	3	3	2.75
GossWiltAssocMap	1	21	37	2014	N546	1	1	1	1
GossWiltAssocMap	1	21	39	2014	F39	3	4	5	4
GossWiltAssocMap	1	22	3	2014	YE-CHI-HUNG	2	3	4	3
GossWiltAssocMap	1	22	5	2014	I205	2	2	2	2
GossWiltAssocMap	1	22	7	2014	CHI-41	1	1	1	1
GossWiltAssocMap	1	22	9	2014	N28HT	2	3	3	2.75
GossWiltAssocMap	1	22	11	2014	NO. 1070 INBRED	2	3	3	2.75
GossWiltAssocMap	1	22	13	2014	E205-1-1-1 INBRED (S5 SYN. ANVELD)	1	1	1	1
GossWiltAssocMap	1	22	15	2014	MBST	1	1	1	1
GossWiltAssocMap	1	22	17	2014	WR3	1	1	3	1.5
GossWiltAssocMap	1	22	19	2014	DAS4	1	1	2	1.25
GossWiltAssocMap	1	22	21	2014	IL677A	NA	NA	NA	NA
GossWiltAssocMap	1	22	23	2014	CH741-6	2	2	5	2.75
GossWiltAssocMap	1	22	25	2014	R101	3	4	4	3.75
GossWiltAssocMap	1	22	27	2014	FAPW	1	2	2	1.75
GossWiltAssocMap	1	22	29	2014	MS200	1	2	3	2
GossWiltAssocMap	1	22	31	2014	CI 75	1	1	1	1
GossWiltAssocMap	1	22	33	2014	R78	1	1	1	1
GossWiltAssocMap	1	22	35	2014	SD42	1	1	1	1
GossWiltAssocMap	1	22	37	2014	B77	2	3	3	2.75
GossWiltAssocMap	1	22	39	2014	78551S	1	2	2	1.75
GossWiltAssocMap	1	23	3	2014	NC302	NA	NA	NA	NA
GossWiltAssocMap	1	23	5	2014	PHR47	2	2	2	2
GossWiltAssocMap	1	23	7	2014	R109B	NA	NA	NA	NA
GossWiltAssocMap	1	23	9	2014	STRAIN T20-2-68(B)	1	2	3	2
GossWiltAssocMap	1	23	11	2014	N505	3	3	3	3
GossWiltAssocMap	1	23	13	2014	11430	2	2	3	2.25
GossWiltAssocMap	1	23	15	2014	PHT10	1	1	1	1
GossWiltAssocMap	1	23	17	2014	MO49	1	3	4	2.75
GossWiltAssocMap	1	23	19	2014	207	1	2	2	1.75
GossWiltAssocMap	1	23	21	2014	H105W	2	3	4	3
GossWiltAssocMap	1	23	23	2014	LH74	1	1	1	1
GossWiltAssocMap	1	23	25	2014	TR	1	2	2	1.75
GossWiltAssocMap	1	23	27	2014	VA59	1	1	1	1
GossWiltAssocMap	1	23	29	2014	PHJ33	1	1	1	1
GossWiltAssocMap	1	23	31	2014	MO1W	1	1	1	1
GossWiltAssocMap	1	23	33	2014	B14A	3	3	3	3
GossWiltAssocMap	1	23	35	2014	A617	1	2	3	2
GossWiltAssocMap	1	23	37	2014	A686SU	2	3	3	2.75
GossWiltAssocMap	1	23	39	2014	NYRD4058	1	1	1	1
GossWiltAssocMap	1	24	3	2014	MO45	2	3	3	2.75
GossWiltAssocMap	1	24	5	2014	NC292	1	1	1	1
GossWiltAssocMap	1	24	7	2014	PHW20	1	1	1	1
GossWiltAssocMap	1	24	9	2014	C123	1	1	1	1
GossWiltAssocMap	1	24	11	2014	B100	1	1	1	1
GossWiltAssocMap	1	24	13	2014	NC364	1	1	1	1
GossWiltAssocMap	1	24	15	2014	IDS69	2	2	2	2
GossWiltAssocMap	2	2	41	2014	ND480	5	5	5	5
GossWiltAssocMap	2	2	43	2014	NC260	1	1	1	1
GossWiltAssocMap	2	2	45	2014	H45	1	2	2	1.75
GossWiltAssocMap	2	2	47	2014	R4	NA	NA	NA	NA
GossWiltAssocMap	2	2	49	2014	PHM49	NA	NA	NA	NA
GossWiltAssocMap	2	2	51	2014	TX204	1	1	1	1
GossWiltAssocMap	2	2	53	2014	GT119	1	3	3	2.5
GossWiltAssocMap	2	2	55	2014	5707	NA	NA	NA	NA
GossWiltAssocMap	2	2	57	2014	BEI 10 = NORTH 10	NA	NA	NA	NA
GossWiltAssocMap	2	2	59	2014	NYLB31	2	3	3	2.75
GossWiltAssocMap	2	2	61	2014	NY6371	4	4	4	4
GossWiltAssocMap	2	2	63	2014	78002A	1	2	3	2
GossWiltAssocMap	2	2	65	2014	K148	1	2	3	2
GossWiltAssocMap	2	2	67	2014	4581 INBRED	1	2	2	1.75
GossWiltAssocMap	2	2	69	2014	A208	1	1	1	1
GossWiltAssocMap	2	2	71	2014	AUSTRCF 306306	3	4	5	4
GossWiltAssocMap	2	2	73	2014	W 3607	1	2	3	2
GossWiltAssocMap	2	2	75	2014	R177	2	2	2	2
GossWiltAssocMap	2	2	77	2014	W572	2	2	2	2
GossWiltAssocMap	2	3	41	2014	NY 428 (NEVEH YAAR)	3	4	4	3.75
GossWiltAssocMap	2	3	43	2014	ABPL 2	1	2	3	2
GossWiltAssocMap	2	3	45	2014	INBRED 309	5	5	6	5.25
GossWiltAssocMap	2	3	47	2014	AUSTRCF 306350	NA	NA	NA	NA
GossWiltAssocMap	2	3	49	2014	WXI198	NA	NA	NA	NA
GossWiltAssocMap	2	3	51	2014	N72-3-1-1 INBRED	1	2	2	1.75
GossWiltAssocMap	2	3	53	2014	A678	NA	NA	NA	NA
GossWiltAssocMap	2	3	55	2014	NC372	NA	NA	NA	NA
GossWiltAssocMap	2	3	57	2014	B57	NA	NA	NA	NA
GossWiltAssocMap	2	3	59	2014	OC8	2	3	4	3
GossWiltAssocMap	2	3	61	2014	T242	2	4	5	3.75
GossWiltAssocMap	2	3	63	2014	A305	4	5	5	4.75
GossWiltAssocMap	2	3	65	2014	764	1	1	2	1.25
GossWiltAssocMap	2	3	67	2014	B14A	2	3	3	2.75
GossWiltAssocMap	2	3	69	2014	PHV78	2	2	1	1.75
GossWiltAssocMap	2	3	71	2014	MO512BW	2	3	4	3
GossWiltAssocMap	2	3	73	2014	B47	1	1	1	1
GossWiltAssocMap	2	3	75	2014	H106W	2	2	1	1.75
GossWiltAssocMap	2	3	77	2014	PA871	2	2	2	2
GossWiltAssocMap	2	4	41	2014	A628	2	4	4	3.5
GossWiltAssocMap	2	4	43	2014	B75	1	1	1	1
GossWiltAssocMap	2	4	45	2014	(TWAN X TZUH)-S6	2	4	6	4
GossWiltAssocMap	2	4	47	2014	SG18	NA	NA	NA	NA
GossWiltAssocMap	2	4	49	2014	H84	NA	NA	NA	NA
GossWiltAssocMap	2	4	51	2014	CH711-10	1	2	3	2
GossWiltAssocMap	2	4	53	2014	OC12	2	2	2	2
GossWiltAssocMap	2	4	55	2014	OH43	NA	NA	NA	NA
GossWiltAssocMap	2	4	57	2014	MDF-13D	NA	NA	NA	NA
GossWiltAssocMap	2	4	59	2014	B109	1	2	2	1.75
GossWiltAssocMap	2	4	61	2014	A660	1	2	2	1.75
GossWiltAssocMap	2	4	63	2014	MS81	2	2	2	2
GossWiltAssocMap	2	4	65	2014	R78	1	2	2	1.75
GossWiltAssocMap	2	4	67	2014	B14A	2	3	3	2.75
GossWiltAssocMap	2	4	69	2014	N502	2	3	3	2.75
GossWiltAssocMap	2	4	71	2014	R113	1	1	1	1
GossWiltAssocMap	2	4	73	2014	YE-CHI-HUNG	3	4	4	3.75
GossWiltAssocMap	2	4	75	2014	MO1W	1	1	1	1
GossWiltAssocMap	2	4	77	2014	DE1	2	2	2	2
GossWiltAssocMap	2	5	41	2014	IBB14	3	3	3	3
GossWiltAssocMap	2	5	43	2014	B46	1	3	3	2.5
GossWiltAssocMap	2	5	45	2014	N28HT	3	4	4	3.75
GossWiltAssocMap	2	5	47	2014	NC308	NA	NA	NA	NA
GossWiltAssocMap	2	5	49	2014	AUSTRCF 306348	NA	NA	NA	NA
GossWiltAssocMap	2	5	51	2014	R192	1	2	2	1.75
GossWiltAssocMap	2	5	53	2014	LH119	2	2	2	2
GossWiltAssocMap	2	5	55	2014	TR	NA	NA	NA	NA
GossWiltAssocMap	2	5	57	2014	B105	NA	NA	NA	NA
GossWiltAssocMap	2	5	59	2014	LH82	2	4	4	3.5
GossWiltAssocMap	2	5	61	2014	NS701	2	3	3	2.75
GossWiltAssocMap	2	5	63	2014	CI 72	1	1	1	1
GossWiltAssocMap	2	5	65	2014	WF9	1	1	2	1.25
GossWiltAssocMap	2	5	67	2014	ENG-LI CHIH	1	1	1	1
GossWiltAssocMap	2	5	69	2014	A334	2	2	3	2.25
GossWiltAssocMap	2	5	71	2014	N521	1	2	3	2
GossWiltAssocMap	2	5	73	2014	MS72	2	3	3	2.75
GossWiltAssocMap	2	5	75	2014	H98	2	2	2	2
GossWiltAssocMap	2	5	77	2014	CO258	1	2	2	1.75
GossWiltAssocMap	2	6	41	2014	PHK35	1	1	1	1
GossWiltAssocMap	2	6	43	2014	P51	1	4	5	3.5
GossWiltAssocMap	2	6	45	2014	B14A	2	3	3	2.75
GossWiltAssocMap	2	6	47	2014	A635	NA	NA	NA	NA
GossWiltAssocMap	2	6	49	2014	B76	NA	NA	NA	NA
GossWiltAssocMap	2	6	51	2014	B77	2	3	3	2.75
GossWiltAssocMap	2	6	53	2014	MS132	2	3	3	2.75
GossWiltAssocMap	2	6	55	2014	IA DS 53	NA	NA	NA	NA
GossWiltAssocMap	2	6	57	2014	VA35	NA	NA	NA	NA
GossWiltAssocMap	2	6	59	2014	89S4157	1	2	3	2
GossWiltAssocMap	2	6	61	2014	CI 75	1	1	1	1
GossWiltAssocMap	2	6	63	2014	OS426	1	2	2	1.75
GossWiltAssocMap	2	6	65	2014	PHT77	1	2	3	2
GossWiltAssocMap	2	6	67	2014	OH84	1	2	2	1.75
GossWiltAssocMap	2	6	69	2014	R159	3	3	3	3
GossWiltAssocMap	2	6	71	2014	LH193	1	2	2	1.75
GossWiltAssocMap	2	6	73	2014	OH40B	1	1	1	1
GossWiltAssocMap	2	6	75	2014	PHW43	3	3	3	3
GossWiltAssocMap	2	6	77	2014	AUSTRCF 306336	2	2	2	2
GossWiltAssocMap	2	7	41	2014	NC310	2	2	2	2
GossWiltAssocMap	2	7	43	2014	A239	2	3	4	3
GossWiltAssocMap	2	7	45	2014	B87	4	5	7	5.25
GossWiltAssocMap	2	7	47	2014	H49	NA	NA	NA	NA
GossWiltAssocMap	2	7	49	2014	HB8229	NA	NA	NA	NA
GossWiltAssocMap	2	7	51	2014	MBST	1	2	2	1.75
GossWiltAssocMap	2	7	53	2014	H8431	2	4	3	3.25
GossWiltAssocMap	2	7	55	2014	AUSTRCF 306333	NA	NA	NA	NA
GossWiltAssocMap	2	7	57	2014	B14A	NA	NA	NA	NA
GossWiltAssocMap	2	7	59	2014	R221	2	3	3	2.75
GossWiltAssocMap	2	7	61	2014	OC10	1	1	1	1
GossWiltAssocMap	2	7	63	2014	PHG83	1	1	1	1
GossWiltAssocMap	2	7	65	2014	H103	2	3	3	2.75
GossWiltAssocMap	2	7	67	2014	A644	2	2	2	2
GossWiltAssocMap	2	7	69	2014	P737M20	2	2	2	2
GossWiltAssocMap	2	7	71	2014	A619HT	3	3	3	3
GossWiltAssocMap	2	7	73	2014	PHG50	NA	NA	NA	NA
GossWiltAssocMap	2	7	75	2014	PA877	NA	NA	NA	NA
GossWiltAssocMap	2	7	77	2014	B108	2	4	4	3.5
GossWiltAssocMap	2	8	41	2014	H113	1	1	1	1
GossWiltAssocMap	2	8	43	2014	PHT60	1	1	1	1
GossWiltAssocMap	2	8	45	2014	LH39	3	3	3	3
GossWiltAssocMap	2	8	47	2014	E205-1-1-1 INBRED (S5 SYN. ANVELD)	NA	NA	NA	NA
GossWiltAssocMap	2	8	49	2014	2MA22	NA	NA	NA	NA
GossWiltAssocMap	2	8	51	2014	794	2	3	5	3.25
GossWiltAssocMap	2	8	53	2014	A632	3	4	5	4
GossWiltAssocMap	2	8	55	2014	R109B	NA	NA	NA	NA
GossWiltAssocMap	2	8	57	2014	OS420	NA	NA	NA	NA
GossWiltAssocMap	2	8	59	2014	PHK29	1	1	1	1
GossWiltAssocMap	2	8	61	2014	4F-342 CM 4	3	5	5	4.5
GossWiltAssocMap	2	8	63	2014	676A-348-68(B)	1	1	1	1
GossWiltAssocMap	2	8	65	2014	VA52	1	2	2	1.75
GossWiltAssocMap	2	8	67	2014	PA875	1	1	1	1
GossWiltAssocMap	2	8	69	2014	MO15W	2	2	1	1.75
GossWiltAssocMap	2	8	71	2014	WR3	2	3	3	2.75
GossWiltAssocMap	2	8	73	2014	OC3	1	1	1	1
GossWiltAssocMap	2	8	75	2014	R181B	5	5	6	5.25
GossWiltAssocMap	2	8	77	2014	B14A	3	4	3	3.5
GossWiltAssocMap	2	9	41	2014	A656	2	3	4	3
GossWiltAssocMap	2	9	43	2014	W 3647	1	1	2	1.25
GossWiltAssocMap	2	9	45	2014	OC16	2	3	3	2.75
GossWiltAssocMap	2	9	47	2014	B37	NA	NA	NA	NA
GossWiltAssocMap	2	9	49	2014	NC328	NA	NA	NA	NA
GossWiltAssocMap	2	9	51	2014	OC7	3	4	5	4
GossWiltAssocMap	2	9	53	2014	C123	1	1	1	1
GossWiltAssocMap	2	9	55	2014	NYRD4058	NA	NA	NA	NA
GossWiltAssocMap	2	9	57	2014	OH33	NA	NA	NA	NA
GossWiltAssocMap	2	9	59	2014	78010	2	2	2	2
GossWiltAssocMap	2	9	61	2014	A643	2	2	3	2.25
GossWiltAssocMap	2	9	63	2014	R168	1	2	2	1.75
GossWiltAssocMap	2	9	65	2014	A166	2	3	3	2.75
GossWiltAssocMap	2	9	67	2014	N509	1	1	2	1.25
GossWiltAssocMap	2	9	69	2014	78551S	1	2	3	2
GossWiltAssocMap	2	9	71	2014	PHT22	3	3	3	3
GossWiltAssocMap	2	9	73	2014	H100	3	4	4	3.75
GossWiltAssocMap	2	9	75	2014	T8445 INBRED	2	2	2	2
GossWiltAssocMap	2	9	77	2014	IL778D	1	1	1	1
GossWiltAssocMap	2	10	41	2014	PA762	2	2	2	2
GossWiltAssocMap	2	10	43	2014	89S4125	2	2	2	2
GossWiltAssocMap	2	10	45	2014	A659	2	4	4	3.5
GossWiltAssocMap	2	10	47	2014	H121	NA	NA	NA	NA
GossWiltAssocMap	2	10	49	2014	B164	NA	NA	NA	NA
GossWiltAssocMap	2	10	51	2014	W8304	1	2	2	1.75
GossWiltAssocMap	2	10	53	2014	PA405	1	1	1	1
GossWiltAssocMap	2	10	55	2014	B14A	NA	NA	NA	NA
GossWiltAssocMap	2	10	57	2014	STRAIN 11D-586-68(A)	NA	NA	NA	NA
GossWiltAssocMap	2	10	59	2014	MO49	2	4	4	3.5
GossWiltAssocMap	2	10	61	2014	H108	1	1	1	1
GossWiltAssocMap	2	10	63	2014	N6	2	2	2	2
GossWiltAssocMap	2	10	65	2014	SD46	1	1	1	1
GossWiltAssocMap	2	10	67	2014	PHG86	2	2	3	2.25
GossWiltAssocMap	2	10	69	2014	CH732-12	3	3	4	3.25
GossWiltAssocMap	2	10	71	2014	SD41	2	3	3	2.75
GossWiltAssocMap	2	10	73	2014	J8606	3	3	3	3
GossWiltAssocMap	2	10	75	2014	AUSTRCF 306239	1	1	1	1
GossWiltAssocMap	2	10	77	2014	EAST 028	1	2	2	1.75
GossWiltAssocMap	2	11	41	2014	N533	2	4	4	3.5
GossWiltAssocMap	2	11	43	2014	B116	1	1	1	1
GossWiltAssocMap	2	11	45	2014	A401	2	4	4	3.5
GossWiltAssocMap	2	11	47	2014	B14A	NA	NA	NA	NA
GossWiltAssocMap	2	11	49	2014	STRAIN T20-2-68(B)	NA	NA	NA	NA
GossWiltAssocMap	2	11	51	2014	MO46	2	2	2	2
GossWiltAssocMap	2	11	53	2014	CH705-8	2	5	7	4.75
GossWiltAssocMap	2	11	55	2014	LH132	NA	NA	NA	NA
GossWiltAssocMap	2	11	57	2014	FBHJ	NA	NA	NA	NA
GossWiltAssocMap	2	11	59	2014	Q381	2	2	2	2
GossWiltAssocMap	2	11	61	2014	NC292	1	2	2	1.75
GossWiltAssocMap	2	11	63	2014	GE54	1	1	1	1
GossWiltAssocMap	2	11	65	2014	F2834T	1	1	1	1
GossWiltAssocMap	2	11	67	2014	MS203	2	3	3	2.75
GossWiltAssocMap	2	11	69	2014	A663	2	3	4	3
GossWiltAssocMap	2	11	71	2014	N7A	2	3	3	2.75
GossWiltAssocMap	2	11	73	2014	VA102	1	1	1	1
GossWiltAssocMap	2	11	75	2014	DAS2	1	1	1	1
GossWiltAssocMap	2	11	77	2014	B107	1	1	1	1
GossWiltAssocMap	2	12	41	2014	A625	2	3	3	2.75
GossWiltAssocMap	2	12	43	2014	PHW20	3	4	4	3.75
GossWiltAssocMap	2	12	45	2014	A686SU	2	3	4	3
GossWiltAssocMap	2	12	47	2014	NC302	NA	NA	NA	NA
GossWiltAssocMap	2	12	49	2014	NO. 1049 INBRED	NA	NA	NA	NA
GossWiltAssocMap	2	12	51	2014	N516	1	2	2	1.75
GossWiltAssocMap	2	12	53	2014	PA778	2	2	2	2
GossWiltAssocMap	2	12	55	2014	CO256	NA	NA	NA	NA
GossWiltAssocMap	2	12	57	2014	W22	NA	NA	NA	NA
GossWiltAssocMap	2	12	59	2014	A634	4	4	6	4.5
GossWiltAssocMap	2	12	61	2014	L	1	2	3	2
GossWiltAssocMap	2	12	63	2014	PHJ33	1	1	1	1
GossWiltAssocMap	2	12	65	2014	MO48	3	3	3	3
GossWiltAssocMap	2	12	67	2014	N530	2	3	3	2.75
GossWiltAssocMap	2	12	69	2014	OC15	1	2	3	2
GossWiltAssocMap	2	12	71	2014	A548	2	2	3	2.25
GossWiltAssocMap	2	12	73	2014	R907	2	3	3	2.75
GossWiltAssocMap	2	12	75	2014	WX33-16	2	2	2	2
GossWiltAssocMap	2	12	77	2014	NO. 1068 INBRED	4	5	6	5
GossWiltAssocMap	2	13	41	2014	CH741-6	2	5	7	4.75
GossWiltAssocMap	2	13	43	2014	B97	1	2	2	1.75
GossWiltAssocMap	2	13	45	2014	A258	2	4	4	3.5
GossWiltAssocMap	2	13	47	2014	89S4083	NA	NA	NA	NA
GossWiltAssocMap	2	13	49	2014	P39M96	NA	NA	NA	NA
GossWiltAssocMap	2	13	51	2014	W64A	1	2	2	1.75
GossWiltAssocMap	2	13	53	2014	K55	1	1	1	1
GossWiltAssocMap	2	13	55	2014	2369	NA	NA	NA	NA
GossWiltAssocMap	2	13	57	2014	A357	NA	NA	NA	NA
GossWiltAssocMap	2	13	59	2014	W 6462	NA	2	NA	NA
GossWiltAssocMap	2	13	61	2014	PHB47	1	1	1	1
GossWiltAssocMap	2	13	63	2014	4676A	2	2	2	2
GossWiltAssocMap	2	13	65	2014	LH220HT	3	4	4	3.75
GossWiltAssocMap	2	13	67	2014	LH38	1	2	2	1.75
GossWiltAssocMap	2	13	69	2014	B14A	2	3	3	2.75
GossWiltAssocMap	2	13	71	2014	78371A	1	2	2	1.75
GossWiltAssocMap	2	13	73	2014	NC330	1	1	1	1
GossWiltAssocMap	2	13	75	2014	A617	1	3	3	2.5
GossWiltAssocMap	2	13	77	2014	K150	4	4	4	4
GossWiltAssocMap	2	14	41	2014	B91	1	1	1	1
GossWiltAssocMap	2	14	43	2014	N505	4	4	4	4
GossWiltAssocMap	2	14	45	2014	MS77	3	3	3	3
GossWiltAssocMap	2	14	47	2014	VA99	NA	NA	NA	NA
GossWiltAssocMap	2	14	49	2014	PA91	NA	NA	NA	NA
GossWiltAssocMap	2	14	51	2014	G80	1	1	1	1
GossWiltAssocMap	2	14	53	2014	MS100	4	5	5	4.75
GossWiltAssocMap	2	14	55	2014	VA16	NA	NA	NA	NA
GossWiltAssocMap	2	14	57	2014	OH422	NA	NA	NA	NA
GossWiltAssocMap	2	14	59	2014	GT113	3	3	3	3
GossWiltAssocMap	2	14	61	2014	M14	1	1	2	1.25
GossWiltAssocMap	2	14	63	2014	LH128	1	1	1	1
GossWiltAssocMap	2	14	65	2014	B14A	2	3	3	2.75
GossWiltAssocMap	2	14	67	2014	OH56A	1	2	3	2
GossWiltAssocMap	2	14	69	2014	IA 61	1	2	2	1.75
GossWiltAssocMap	2	14	71	2014	F39	3	4	4	3.75
GossWiltAssocMap	2	14	73	2014	H126W	1	1	1	1
GossWiltAssocMap	2	14	75	2014	MS221	2	3	3	2.75
GossWiltAssocMap	2	14	77	2014	NO. 1037 INBRED	1	2	2	1.75
GossWiltAssocMap	2	15	41	2014	CI 20	2	2	3	2.25
GossWiltAssocMap	2	15	43	2014	MS214	1	1	1	1
GossWiltAssocMap	2	15	45	2014	LH123HT	2	3	3	2.75
GossWiltAssocMap	2	15	47	2014	PHG71	NA	NA	NA	NA
GossWiltAssocMap	2	15	49	2014	A671	NA	NA	NA	NA
GossWiltAssocMap	2	15	51	2014	B41	1	1	2	1.25
GossWiltAssocMap	2	15	53	2014	INBRED 34-1141	5	7	8	6.75
GossWiltAssocMap	2	15	55	2014	PHR36	NA	NA	NA	NA
GossWiltAssocMap	2	15	57	2014	OC14	NA	NA	NA	NA
GossWiltAssocMap	2	15	59	2014	MS215	1	2	2	1.75
GossWiltAssocMap	2	15	61	2014	PHR47	2	3	3	2.75
GossWiltAssocMap	2	15	63	2014	A260	2	2	3	2.25
GossWiltAssocMap	2	15	65	2014	PHZ51	2	2	2	2
GossWiltAssocMap	2	15	67	2014	WXK44	1	1	1	1
GossWiltAssocMap	2	15	69	2014	B100	1	1	1	1
GossWiltAssocMap	2	15	71	2014	VA26	2	2	2	2
GossWiltAssocMap	2	15	73	2014	FAPW	2	2	2	2
GossWiltAssocMap	2	15	75	2014	MS24	3	4	6	4.25
GossWiltAssocMap	2	15	77	2014	A664	4	4	5	4.25
GossWiltAssocMap	2	16	41	2014	AUSTRCF 305836	1	1	1	1
GossWiltAssocMap	2	16	43	2014	B14A	2	3	3	2.75
GossWiltAssocMap	2	16	45	2014	IDS69	2	2	2	2
GossWiltAssocMap	2	16	47	2014	LH127	NA	NA	NA	NA
GossWiltAssocMap	2	16	49	2014	MO45	NA	NA	NA	NA
GossWiltAssocMap	2	16	51	2014	CH157	2	3	3	2.75
GossWiltAssocMap	2	16	53	2014	T IEH 84	4	6	6	5.5
GossWiltAssocMap	2	16	55	2014	N200	NA	NA	NA	NA
GossWiltAssocMap	2	16	57	2014	T8	NA	NA	NA	NA
GossWiltAssocMap	2	16	59	2014	N513	1	1	1	1
GossWiltAssocMap	2	16	61	2014	R101	4	4	4	4
GossWiltAssocMap	2	16	63	2014	B85	1	2	2	1.75
GossWiltAssocMap	2	16	65	2014	LH1	2	3	3	2.75
GossWiltAssocMap	2	16	67	2014	H105W	3	4	5	4
GossWiltAssocMap	2	16	69	2014	PHR62	1	1	1	1
GossWiltAssocMap	2	16	71	2014	R2	2	4	4	3.5
GossWiltAssocMap	2	16	73	2014	A645	2	4	4	3.5
GossWiltAssocMap	2	16	75	2014	LH74	2	2	3	2.25
GossWiltAssocMap	2	16	77	2014	207	1	2	2	1.75
GossWiltAssocMap	2	17	41	2014	N543	2	3	3	2.75
GossWiltAssocMap	2	17	43	2014	NC290A	1	1	1	1
GossWiltAssocMap	2	17	45	2014	CI90C	1	1	1	1
GossWiltAssocMap	2	17	47	2014	IDS91	NA	NA	NA	NA
GossWiltAssocMap	2	17	49	2014	2 KM 368 INBRED	NA	NA	NA	NA
GossWiltAssocMap	2	17	51	2014	N199	1	2	2	1.75
GossWiltAssocMap	2	17	53	2014	SD42	2	3	3	2.75
GossWiltAssocMap	2	17	55	2014	N524	NA	NA	NA	NA
GossWiltAssocMap	2	17	57	2014	A295	NA	NA	NA	NA
GossWiltAssocMap	2	17	59	2014	B14A	2	3	4	3
GossWiltAssocMap	2	17	61	2014	A15-1 INBRED (POTCHEFSTROOM PEARL)	1	2	2	1.75
GossWiltAssocMap	2	17	63	2014	B79	1	2	3	2
GossWiltAssocMap	2	17	65	2014	PHJ70	2	3	3	2.75
GossWiltAssocMap	2	17	67	2014	PHM10	1	1	1	1
GossWiltAssocMap	2	17	69	2014	HP301	2	2	2	2
GossWiltAssocMap	2	17	71	2014	11430	2	3	3	2.75
GossWiltAssocMap	2	17	73	2014	NC262	1	1	1	1
GossWiltAssocMap	2	17	75	2014	DAS4	2	2	3	2.25
GossWiltAssocMap	2	17	77	2014	N192	3	4	5	4
GossWiltAssocMap	2	18	41	2014	LH208	1	2	2	1.75
GossWiltAssocMap	2	18	43	2014	SA24	1	2	2	1.75
GossWiltAssocMap	2	18	45	2014	MS80	1	2	2	1.75
GossWiltAssocMap	2	18	47	2014	NC342	NA	NA	NA	NA
GossWiltAssocMap	2	18	49	2014	790	NA	NA	NA	NA
GossWiltAssocMap	2	18	51	2014	I205	2	3	3	2.75
GossWiltAssocMap	2	18	53	2014	PA356	3	4	4	3.75
GossWiltAssocMap	2	18	55	2014	IDS28	NA	NA	NA	NA
GossWiltAssocMap	2	18	57	2014	N552	NA	NA	NA	NA
GossWiltAssocMap	2	18	59	2014	A680	1	2	3	2
GossWiltAssocMap	2	18	61	2014	STRAIN 465A-421-68(B)	1	2	2	1.75
GossWiltAssocMap	2	18	63	2014	LH60	1	1	1	1
GossWiltAssocMap	2	18	65	2014	YONG 28	3	4	4	3.75
GossWiltAssocMap	2	18	67	2014	MS200	2	3	3	2.75
GossWiltAssocMap	2	18	69	2014	N503	3	4	4	3.75
GossWiltAssocMap	2	18	71	2014	N501	2	2	2	2
GossWiltAssocMap	2	18	73	2014	C410-1(F11) INBRED (HOTNOT CROSSES)	2	2	2	2
GossWiltAssocMap	2	18	75	2014	B14A	2	3	3	2.75
GossWiltAssocMap	2	18	77	2014	PHW65	1	2	2	1.75
GossWiltAssocMap	2	19	41	2014	MS226	3	3	3	3
GossWiltAssocMap	2	19	43	2014	H99	2	1	1	1.25
GossWiltAssocMap	2	19	45	2014	MBPM	1	1	1	1
GossWiltAssocMap	2	19	47	2014	PHW52	NA	NA	NA	NA
GossWiltAssocMap	2	19	49	2014	IL677A	NA	NA	NA	NA
GossWiltAssocMap	2	19	51	2014	LH93	2	3	3	2.75
GossWiltAssocMap	2	19	53	2014	B67	2	2	2	2
GossWiltAssocMap	2	19	55	2014	R154	NA	NA	NA	NA
GossWiltAssocMap	2	19	57	2014	E8501	NA	NA	NA	NA
GossWiltAssocMap	2	19	59	2014	MS211	1	3	4	2.75
GossWiltAssocMap	2	19	61	2014	90	3	3	3	3
GossWiltAssocMap	2	19	63	2014	LH145HT	3	4	5	4
GossWiltAssocMap	2	19	65	2014	MO47	4	4	4	4
GossWiltAssocMap	2	19	67	2014	VA22	1	1	1	1
GossWiltAssocMap	2	19	69	2014	PHG35	1	1	1	1
GossWiltAssocMap	2	19	71	2014	52220	1	1	1	1
GossWiltAssocMap	2	19	73	2014	PHN73	2	3	3	2.75
GossWiltAssocMap	2	19	75	2014	NC250	1	1	1	1
GossWiltAssocMap	2	19	77	2014	89S4145	2	3	3	2.75
GossWiltAssocMap	2	20	41	2014	WXB6	2	3	3	2.75
GossWiltAssocMap	2	20	43	2014	AUSTRCF 306238	1	3	3	2.5
GossWiltAssocMap	2	20	45	2014	SD63	2	2	2	2
GossWiltAssocMap	2	20	47	2014	NO. 1070 INBRED	NA	NA	NA	NA
GossWiltAssocMap	2	20	49	2014	A627	NA	NA	NA	NA
GossWiltAssocMap	2	20	51	2014	IA453	2	4	4	3.5
GossWiltAssocMap	2	20	53	2014	B14A	3	4	4	3.75
GossWiltAssocMap	2	20	55	2014	SD40	NA	NA	NA	NA
GossWiltAssocMap	2	20	57	2014	A251	NA	NA	NA	NA
GossWiltAssocMap	2	20	59	2014	PA468	2	3	3	2.75
GossWiltAssocMap	2	20	61	2014	PHW79	1	1	1	1
GossWiltAssocMap	2	20	63	2014	S8326	1	2	2	1.75
GossWiltAssocMap	2	20	65	2014	VA18A	1	1	NA	1
GossWiltAssocMap	2	20	67	2014	HY2	1	1	1	1
GossWiltAssocMap	2	20	69	2014	PHN29	3	4	6	4.25
GossWiltAssocMap	2	20	71	2014	NC232	2	3	3	2.75
GossWiltAssocMap	2	20	73	2014	H95	1	2	2	1.75
GossWiltAssocMap	2	20	75	2014	PHT10	1	2	3	2
GossWiltAssocMap	2	20	77	2014	N523	1	1	1	1
GossWiltAssocMap	2	21	41	2014	R197	3	5	6	4.75
GossWiltAssocMap	2	21	43	2014	LH156	1	1	1	1
GossWiltAssocMap	2	21	45	2014	DE811	NA	NA	NA	NA
GossWiltAssocMap	2	21	47	2014	NC278	NA	NA	NA	NA
GossWiltAssocMap	2	21	49	2014	B14A	NA	NA	NA	NA
GossWiltAssocMap	2	21	51	2014	CHI-41	2	3	3	2.75
GossWiltAssocMap	2	21	53	2014	HBA1	2	3	3	2.75
GossWiltAssocMap	2	21	55	2014	NO. 1201 INBRED	NA	NA	NA	NA
GossWiltAssocMap	2	21	57	2014	OC5	NA	NA	NA	NA
GossWiltAssocMap	2	21	59	2014	PHW17	1	1	1	1
GossWiltAssocMap	2	21	61	2014	TX205	NA	NA	NA	NA
GossWiltAssocMap	2	21	63	2014	A632HT	NA	NA	NA	NA
GossWiltAssocMap	2	21	65	2014	PA376	1	2	2	1.75
GossWiltAssocMap	2	21	67	2014	C103	1	1	1	1
GossWiltAssocMap	2	21	69	2014	CI45	1	1	1	1
GossWiltAssocMap	2	21	71	2014	I29	2	3	3	2.75
GossWiltAssocMap	2	21	73	2014	DAS3	1	1	1	1
GossWiltAssocMap	2	21	75	2014	NC364	1	1	1	1
GossWiltAssocMap	2	21	77	2014	A14NW	2	3	4	3
GossWiltAssocMap	2	22	41	2014	B73HT	1	2	2	1.75
GossWiltAssocMap	2	22	43	2014	ND300	1	2	2	1.75
GossWiltAssocMap	2	22	45	2014	793	1	2	3	2
GossWiltAssocMap	2	22	47	2014	IA CG4189	1	3	3	2.5
GossWiltAssocMap	2	22	49	2014	FR19	NA	NA	NA	NA
GossWiltAssocMap	2	22	51	2014	LH59	1	1	1	1
GossWiltAssocMap	2	22	53	2014	4F-259 HQ	2	3	4	3
GossWiltAssocMap	2	22	55	2014	MS224	NA	NA	NA	NA
GossWiltAssocMap	2	22	57	2014	N216	NA	NA	NA	NA
GossWiltAssocMap	2	22	59	2014	DAS1	2	3	3	2.75
GossWiltAssocMap	2	22	61	2014	78004	2	2	3	2.25
GossWiltAssocMap	2	22	63	2014	PHJ31	1	1	1	1
GossWiltAssocMap	2	22	65	2014	MO42	1	1	1	1
GossWiltAssocMap	2	22	67	2014	VA59	1	1	1	1
GossWiltAssocMap	2	22	69	2014	B88	1	2	2	1.75
GossWiltAssocMap	2	22	71	2014	B106	1	1	1	1
GossWiltAssocMap	2	22	73	2014	R71	2	3	4	3
GossWiltAssocMap	2	22	75	2014	MO402	1	1	2	1.25
GossWiltAssocMap	2	22	77	2014	6M502	1	1	1	1
GossWiltAssocMap	2	23	41	2014	MO17	1	1	1	1
GossWiltAssocMap	2	23	43	2014	N801W	1	1	1	1
GossWiltAssocMap	2	23	45	2014	LH205	2	2	2	2
GossWiltAssocMap	2	23	47	2014	MS223	NA	NA	NA	NA
GossWiltAssocMap	2	23	49	2014	R103	NA	NA	NA	NA
GossWiltAssocMap	2	23	51	2014	MS57	1	1	2	1.25
GossWiltAssocMap	2	23	53	2014	R906	2	3	3	2.75
GossWiltAssocMap	2	23	55	2014	T62S	NA	NA	NA	NA
GossWiltAssocMap	2	23	57	2014	2FACC	NA	NA	NA	NA
GossWiltAssocMap	2	23	59	2014	S 48	1	1	2	1.25
GossWiltAssocMap	2	23	61	2014	TZU-CHIAO-HSI-WU 105	2	3	4	3
GossWiltAssocMap	2	23	63	2014	SD102	1	1	1	1
GossWiltAssocMap	2	23	65	2014	LH51	1	1	1	1
GossWiltAssocMap	2	23	67	2014	VA17	1	1	1	1
GossWiltAssocMap	2	23	69	2014	YING-55	2	4	4	3.5
GossWiltAssocMap	2	23	71	2014	B14A	2	3	3	2.75
GossWiltAssocMap	2	23	73	2014	N551	1	1	1	1
GossWiltAssocMap	2	23	75	2014	LH192	1	1	1	1
GossWiltAssocMap	2	23	77	2014	B7	1	1	1	1
GossWiltAssocMap	2	24	41	2014	MS116	1	1	1	1
GossWiltAssocMap	2	24	43	2014	PHK42	2	3	3	2.75
GossWiltAssocMap	2	24	45	2014	LH57	1	1	1	1
GossWiltAssocMap	2	24	47	2014	AUSTRCF 306276	1	1	1	1
GossWiltAssocMap	2	24	49	2014	NC344	NA	NA	NA	NA
GossWiltAssocMap	2	24	51	2014	NO. 1266 INBRED	2	3	3	2.75
GossWiltAssocMap	2	24	53	2014	N546	1	1	1	1
GossWiltAssocMap	3	2	79	2014	BEI 10 = NORTH 10	1	2	2	1.75
GossWiltAssocMap	3	2	81	2014	A166	3	3	3	3
GossWiltAssocMap	3	2	83	2014	R4	2	2	2	2
GossWiltAssocMap	3	2	85	2014	MO42	2	2	3	2.25
GossWiltAssocMap	3	2	87	2014	B106	1	2	2	1.75
GossWiltAssocMap	3	2	89	2014	N552	1	1	1	1
GossWiltAssocMap	3	2	91	2014	PHG50	1	1	1	1
GossWiltAssocMap	3	2	93	2014	OC5	3	4	4	3.75
GossWiltAssocMap	3	2	95	2014	MS223	2	2	2	2
GossWiltAssocMap	3	2	97	2014	NC310	2	2	2	2
GossWiltAssocMap	3	2	99	2014	H121	1	1	1	1
GossWiltAssocMap	3	2	101	2014	NC342	1	2	1	1.5
GossWiltAssocMap	3	2	103	2014	B67	3	4	4	3.75
GossWiltAssocMap	3	2	105	2014	VA17	1	1	1	1
GossWiltAssocMap	3	2	107	2014	WXI198	3	5	6	4.75
GossWiltAssocMap	3	2	109	2014	W22	2	3	3	2.75
GossWiltAssocMap	3	2	111	2014	G80	1	1	1	1
GossWiltAssocMap	3	2	113	2014	SD41	2	3	3	2.75
GossWiltAssocMap	3	2	115	2014	SD42	1	1	1	1
GossWiltAssocMap	3	3	79	2014	PHR36	1	1	1	1
GossWiltAssocMap	3	3	81	2014	B37	2	2	2	2
GossWiltAssocMap	3	3	83	2014	VA59	1	1	1	1
GossWiltAssocMap	3	3	85	2014	4676A	2	3	3	2.75
GossWiltAssocMap	3	3	87	2014	MS215	2	2	2	2
GossWiltAssocMap	3	3	89	2014	LH1	3	3	2	2.75
GossWiltAssocMap	3	3	91	2014	NC250	1	1	1	1
GossWiltAssocMap	3	3	93	2014	N533	3	3	3	3
GossWiltAssocMap	3	3	95	2014	DAS3	1	1	1	1
GossWiltAssocMap	3	3	97	2014	CI90C	2	2	1	1.75
GossWiltAssocMap	3	3	99	2014	MDF-13D	1	1	1	1
GossWiltAssocMap	3	3	101	2014	676A-348-68(B)	2	2	1	1.75
GossWiltAssocMap	3	3	103	2014	R197	4	4	4	4
GossWiltAssocMap	3	3	105	2014	B14A	3	3	3	3
GossWiltAssocMap	3	3	107	2014	4581 INBRED	3	3	2	2.75
GossWiltAssocMap	3	3	109	2014	STRAIN 465A-421-68(B)	2	2	2	2
GossWiltAssocMap	3	3	111	2014	N801W	1	1	1	1
GossWiltAssocMap	3	3	113	2014	A635	4	4	5	4.25
GossWiltAssocMap	3	3	115	2014	N530	3	4	4	3.75
GossWiltAssocMap	3	4	79	2014	R907	2	5	5	4.25
GossWiltAssocMap	3	4	81	2014	WX33-16	2	2	2	2
GossWiltAssocMap	3	4	83	2014	R103	2	3	3	2.75
GossWiltAssocMap	3	4	85	2014	MS57	1	1	1	1
GossWiltAssocMap	3	4	87	2014	OH56A	2	3	3	2.75
GossWiltAssocMap	3	4	89	2014	A258	3	4	3	3.5
GossWiltAssocMap	3	4	91	2014	R109B	3	3	3	3
GossWiltAssocMap	3	4	93	2014	IL677A	NA	NA	NA	NA
GossWiltAssocMap	3	4	95	2014	AUSTRCF 306333	2	4	4	3.5
GossWiltAssocMap	3	4	97	2014	MO17	1	1	1	1
GossWiltAssocMap	3	4	99	2014	F39	3	5	5	4.5
GossWiltAssocMap	3	4	101	2014	R71	4	4	4	4
GossWiltAssocMap	3	4	103	2014	E205-1-1-1 INBRED (S5 SYN. ANVELD)	2	2	3	2.25
GossWiltAssocMap	3	4	105	2014	B14A	3	3	3	3
GossWiltAssocMap	3	4	107	2014	A671	2	3	4	3
GossWiltAssocMap	3	4	109	2014	MBPM	1	1	1	1
GossWiltAssocMap	3	4	111	2014	R101	5	5	5	5
GossWiltAssocMap	3	4	113	2014	NC278	1	1	1	1
GossWiltAssocMap	3	4	115	2014	OH40B	1	1	1	1
GossWiltAssocMap	3	5	79	2014	R113	1	1	1	1
GossWiltAssocMap	3	5	81	2014	N513	2	2	2	2
GossWiltAssocMap	3	5	83	2014	CI45	1	1	1	1
GossWiltAssocMap	3	5	85	2014	B41	2	2	2	2
GossWiltAssocMap	3	5	87	2014	T8	1	1	1	1
GossWiltAssocMap	3	5	89	2014	PHK42	3	4	4	3.75
GossWiltAssocMap	3	5	91	2014	A14NW	2	4	4	3.5
GossWiltAssocMap	3	5	93	2014	W572	2	3	3	2.75
GossWiltAssocMap	3	5	95	2014	OH422	1	1	1	1
GossWiltAssocMap	3	5	97	2014	A644	3	3	2	2.75
GossWiltAssocMap	3	5	99	2014	NY6371	4	5	5	4.75
GossWiltAssocMap	3	5	101	2014	78551S	1	2	3	2
GossWiltAssocMap	3	5	103	2014	CH705-8	2	3	5	3.25
GossWiltAssocMap	3	5	105	2014	PA91	2	2	2	2
GossWiltAssocMap	3	5	107	2014	FR19	4	5	5	4.75
GossWiltAssocMap	3	5	109	2014	N503	5	5	5	5
GossWiltAssocMap	3	5	111	2014	LH132	2	3	3	2.75
GossWiltAssocMap	3	5	113	2014	B47	2	2	1	1.75
GossWiltAssocMap	3	5	115	2014	A401	3	4	4	3.75
GossWiltAssocMap	3	6	79	2014	FBHJ	2	2	2	2
GossWiltAssocMap	3	6	81	2014	B107	1	1	1	1
GossWiltAssocMap	3	6	83	2014	B14A	3	3	3	3
GossWiltAssocMap	3	6	85	2014	PHT22	3	3	3	3
GossWiltAssocMap	3	6	87	2014	INBRED 34-1141	5	7	8	6.75
GossWiltAssocMap	3	6	89	2014	B108	3	6	7	5.5
GossWiltAssocMap	3	6	91	2014	B116	1	1	1	1
GossWiltAssocMap	3	6	93	2014	OC15	1	1	1	1
GossWiltAssocMap	3	6	95	2014	M14	1	1	1	1
GossWiltAssocMap	3	6	97	2014	Q381	2	2	2	2
GossWiltAssocMap	3	6	99	2014	H95	2	3	3	2.75
GossWiltAssocMap	3	6	101	2014	LH39	4	4	4	4
GossWiltAssocMap	3	6	103	2014	J8606	3	3	3	3
GossWiltAssocMap	3	6	105	2014	NYRD4058	1	1	1	1
GossWiltAssocMap	3	6	107	2014	MS24	4	5	5	4.75
GossWiltAssocMap	3	6	109	2014	N199	1	2	2	1.75
GossWiltAssocMap	3	6	111	2014	YING-55	3	5	4	4.25
GossWiltAssocMap	3	6	113	2014	PA376	1	2	1	1.5
GossWiltAssocMap	3	6	115	2014	PHG83	1	1	1	1
GossWiltAssocMap	3	7	79	2014	VA22	1	1	1	1
GossWiltAssocMap	3	7	81	2014	A625	2	3	3	2.75
GossWiltAssocMap	3	7	83	2014	LH156	1	1	1	1
GossWiltAssocMap	3	7	85	2014	78004	1	2	2	1.75
GossWiltAssocMap	3	7	87	2014	PHB47	1	1	1	1
GossWiltAssocMap	3	7	89	2014	H106W	2	2	2	2
GossWiltAssocMap	3	7	91	2014	NC344	1	1	1	1
GossWiltAssocMap	3	7	93	2014	R221	2	2	2	2
GossWiltAssocMap	3	7	95	2014	B14A	3	3	3	3
GossWiltAssocMap	3	7	97	2014	AUSTRCF 305836	1	1	1	1
GossWiltAssocMap	3	7	99	2014	LH205	2	2	2	2
GossWiltAssocMap	3	7	101	2014	H8431	4	4	4	4
GossWiltAssocMap	3	7	103	2014	89S4157	2	2	2	2
GossWiltAssocMap	3	7	105	2014	6M502	2	2	2	2
GossWiltAssocMap	3	7	107	2014	L	2	3	3	2.75
GossWiltAssocMap	3	7	109	2014	LH93	2	2	2	2
GossWiltAssocMap	3	7	111	2014	CH157	3	3	3	3
GossWiltAssocMap	3	7	113	2014	B88	1	1	1	1
GossWiltAssocMap	3	7	115	2014	B91	2	2	1	1.75
GossWiltAssocMap	3	8	79	2014	C103	1	1	1	1
GossWiltAssocMap	3	8	81	2014	NC328	1	1	1	1
GossWiltAssocMap	3	8	83	2014	INBRED 309	4	5	5	4.75
GossWiltAssocMap	3	8	85	2014	TZU-CHIAO-HSI-WU 105	3	4	NA	3.5
GossWiltAssocMap	3	8	87	2014	A643	2	2	2	2
GossWiltAssocMap	3	8	89	2014	HBA1	3	3	3	3
GossWiltAssocMap	3	8	91	2014	SA24	1	3	2	2.25
GossWiltAssocMap	3	8	93	2014	MS211	2	3	4	3
GossWiltAssocMap	3	8	95	2014	B75	1	1	1	1
GossWiltAssocMap	3	8	97	2014	MO47	4	4	4	4
GossWiltAssocMap	3	8	99	2014	AUSTRCF 306238	3	3	3	3
GossWiltAssocMap	3	8	101	2014	B105	2	2	2	2
GossWiltAssocMap	3	8	103	2014	DE811	3	3	3	3
GossWiltAssocMap	3	8	105	2014	DAS2	1	1	2	1.25
GossWiltAssocMap	3	8	107	2014	A663	2	3	3	2.75
GossWiltAssocMap	3	8	109	2014	764	1	1	2	1.25
GossWiltAssocMap	3	8	111	2014	CI 20	2	3	3	2.75
GossWiltAssocMap	3	8	113	2014	A634	3	5	5	4.5
GossWiltAssocMap	3	8	115	2014	B14A	2	3	3	2.75
GossWiltAssocMap	3	9	79	2014	W 6462	2	2	4	2.5
GossWiltAssocMap	3	9	81	2014	A627	4	4	5	4.25
GossWiltAssocMap	3	9	83	2014	PHT77	1	2	3	2
GossWiltAssocMap	3	9	85	2014	OH43	2	2	3	2.25
GossWiltAssocMap	3	9	87	2014	ND480	4	4	4	4
GossWiltAssocMap	3	9	89	2014	2 KM 368 INBRED	1	1	1	1
GossWiltAssocMap	3	9	91	2014	B85	1	1	2	1.25
GossWiltAssocMap	3	9	93	2014	DAS1	2	4	4	3.5
GossWiltAssocMap	3	9	95	2014	HP301	2	3	3	2.75
GossWiltAssocMap	3	9	97	2014	A305	3	4	4	3.75
GossWiltAssocMap	3	9	99	2014	NC302	1	2	2	1.75
GossWiltAssocMap	3	9	101	2014	NC260	2	2	2	2
GossWiltAssocMap	3	9	103	2014	PA877	1	1	1	1
GossWiltAssocMap	3	9	105	2014	CO258	2	2	2	2
GossWiltAssocMap	3	9	107	2014	H99	1	2	2	1.75
GossWiltAssocMap	3	9	109	2014	PHW20	2	3	3	2.75
GossWiltAssocMap	3	9	111	2014	AUSTRCF 306306	2	3	NA	2.5
GossWiltAssocMap	3	9	113	2014	90	3	4	3	3.5
GossWiltAssocMap	3	9	115	2014	PA762	2	3	3	2.75
GossWiltAssocMap	3	10	79	2014	207	1	1	1	1
GossWiltAssocMap	3	10	81	2014	ABPL 2	1	1	1	1
GossWiltAssocMap	3	10	83	2014	MO45	2	2	2	2
GossWiltAssocMap	3	10	85	2014	A251	1	1	1	1
GossWiltAssocMap	3	10	87	2014	OC12	3	3	3	3
GossWiltAssocMap	3	10	89	2014	OS426	2	3	3	2.75
GossWiltAssocMap	3	10	91	2014	NC290A	1	1	1	1
GossWiltAssocMap	3	10	93	2014	B14A	2	3	3	2.75
GossWiltAssocMap	3	10	95	2014	N7A	2	3	4	3
GossWiltAssocMap	3	10	97	2014	PA356	3	4	4	3.75
GossWiltAssocMap	3	10	99	2014	MS100	4	4	4	4
GossWiltAssocMap	3	10	101	2014	K148	1	1	1	1
GossWiltAssocMap	3	10	103	2014	B73HT	1	2	2	1.75
GossWiltAssocMap	3	10	105	2014	NC262	1	1	1	1
GossWiltAssocMap	3	10	107	2014	AUSTRCF 306336	2	2	2	2
GossWiltAssocMap	3	10	109	2014	CO256	3	3	3	3
GossWiltAssocMap	3	10	111	2014	A659	2	4	4	3.5
GossWiltAssocMap	3	10	113	2014	N200	1	2	2	1.75
GossWiltAssocMap	3	10	115	2014	CH741-6	2	4	6	4
GossWiltAssocMap	3	11	79	2014	PHT60	1	1	1	1
GossWiltAssocMap	3	11	81	2014	R192	1	2	2	1.75
GossWiltAssocMap	3	11	83	2014	OC7	3	4	4	3.75
GossWiltAssocMap	3	11	85	2014	B14A	2	2	2	2
GossWiltAssocMap	3	11	87	2014	MS116	2	2	3	2.25
GossWiltAssocMap	3	11	89	2014	PHG86	2	2	2	2
GossWiltAssocMap	3	11	91	2014	IDS69	2	2	2	2
GossWiltAssocMap	3	11	93	2014	MS221	2	2	2	2
GossWiltAssocMap	3	11	95	2014	MS200	2	3	4	3
GossWiltAssocMap	3	11	97	2014	NO. 1070 INBRED	2	3	3	2.75
GossWiltAssocMap	3	11	99	2014	PHZ51	2	3	3	2.75
GossWiltAssocMap	3	11	101	2014	A548	2	2	3	2.25
GossWiltAssocMap	3	11	103	2014	NC330	1	1	1	1
GossWiltAssocMap	3	11	105	2014	IBB14	2	3	3	2.75
GossWiltAssocMap	3	11	107	2014	A628	2	4	6	4
GossWiltAssocMap	3	11	109	2014	PHJ33	1	2	2	1.75
GossWiltAssocMap	3	11	111	2014	CI 75	1	1	2	1.25
GossWiltAssocMap	3	11	113	2014	WXB6	3	3	3	3
GossWiltAssocMap	3	11	115	2014	HB8229	2	3	3	2.75
GossWiltAssocMap	3	12	79	2014	DAS4	2	2	3	2.25
GossWiltAssocMap	3	12	81	2014	A357	2	2	1	1.75
GossWiltAssocMap	3	12	83	2014	NC364	1	1	1	1
GossWiltAssocMap	3	12	85	2014	MO15W	1	1	1	1
GossWiltAssocMap	3	12	87	2014	DE1	2	2	2	2
GossWiltAssocMap	3	12	89	2014	H126W	1	1	2	1.25
GossWiltAssocMap	3	12	91	2014	AUSTRCF 306348	3	4	4	3.75
GossWiltAssocMap	3	12	93	2014	2MA22	3	3	3	3
GossWiltAssocMap	3	12	95	2014	PHR47	2	3	3	2.75
GossWiltAssocMap	3	12	97	2014	78010	2	2	2	2
GossWiltAssocMap	3	12	99	2014	K150	4	4	4	4
GossWiltAssocMap	3	12	101	2014	MS203	2	3	3	2.75
GossWiltAssocMap	3	12	103	2014	PHK35	1	1	1	1
GossWiltAssocMap	3	12	105	2014	OC3	1	1	1	1
GossWiltAssocMap	3	12	107	2014	C123	1	1	1	1
GossWiltAssocMap	3	12	109	2014	MO49	2	4	4	3.5
GossWiltAssocMap	3	12	111	2014	LH57	1	1	1	1
GossWiltAssocMap	3	12	113	2014	N524	1	1	1	1
GossWiltAssocMap	3	12	115	2014	MS226	3	3	3	3
GossWiltAssocMap	3	13	79	2014	B77	2	3	3	2.75
GossWiltAssocMap	3	13	81	2014	NC308	1	2	1	1.5
GossWiltAssocMap	3	13	83	2014	MS132	2	3	3	2.75
GossWiltAssocMap	3	13	85	2014	A686SU	2	4	4	3.5
GossWiltAssocMap	3	13	87	2014	SD40	1	1	1	1
GossWiltAssocMap	3	13	89	2014	A680	1	2	3	2
GossWiltAssocMap	3	13	91	2014	MBST	2	2	2	2
GossWiltAssocMap	3	13	93	2014	PHN73	2	3	3	2.75
GossWiltAssocMap	3	13	95	2014	PHG35	1	2	2	1.75
GossWiltAssocMap	3	13	97	2014	LH193	1	2	2	1.75
GossWiltAssocMap	3	13	99	2014	2FACC	2	3	2	2.5
GossWiltAssocMap	3	13	101	2014	R906	2	3	3	2.75
GossWiltAssocMap	3	13	103	2014	B57	2	3	2	2.5
GossWiltAssocMap	3	13	105	2014	GT119	1	3	3	2.5
GossWiltAssocMap	3	13	107	2014	B14A	3	4	4	3.75
GossWiltAssocMap	3	13	109	2014	LH60	1	1	1	1
GossWiltAssocMap	3	13	111	2014	MO48	2	3	3	2.75
GossWiltAssocMap	3	13	113	2014	PHW65	2	2	2	2
GossWiltAssocMap	3	13	115	2014	B46	2	2	NA	2
GossWiltAssocMap	3	14	79	2014	T62S	2	3	3	2.75
GossWiltAssocMap	3	14	81	2014	OC10	1	1	1	1
GossWiltAssocMap	3	14	83	2014	11430	3	4	4	3.75
GossWiltAssocMap	3	14	85	2014	R168	1	1	1	1
GossWiltAssocMap	3	14	87	2014	OH33	1	3	3	2.5
GossWiltAssocMap	3	14	89	2014	IA 61	NA	NA	NA	NA
GossWiltAssocMap	3	14	91	2014	B87	4	5	5	4.75
GossWiltAssocMap	3	14	93	2014	MO512BW	2	4	4	3.5
GossWiltAssocMap	3	14	95	2014	R78	2	2	2	2
GossWiltAssocMap	3	14	97	2014	PHJ70	2	3	3	2.75
GossWiltAssocMap	3	14	99	2014	PA871	2	2	2	2
GossWiltAssocMap	3	14	101	2014	T IEH 84	4	5	5	4.75
GossWiltAssocMap	3	14	103	2014	B14A	3	4	4	3.75
GossWiltAssocMap	3	14	105	2014	K55	1	1	1	1
GossWiltAssocMap	3	14	107	2014	A660	1	2	2	1.75
GossWiltAssocMap	3	14	109	2014	F2834T	2	2	2	2
GossWiltAssocMap	3	14	111	2014	VA35	2	2	2	2
GossWiltAssocMap	3	14	113	2014	N502	3	3	3	3
GossWiltAssocMap	3	14	115	2014	N523	1	2	2	1.75
GossWiltAssocMap	3	15	79	2014	W8304	1	2	2	1.75
GossWiltAssocMap	3	15	81	2014	PHK29	1	1	1	1
GossWiltAssocMap	3	15	83	2014	B164	2	3	3	2.75
GossWiltAssocMap	3	15	85	2014	LH123HT	2	2	2	2
GossWiltAssocMap	3	15	87	2014	4F-259 HQ	3	5	5	4.5
GossWiltAssocMap	3	15	89	2014	NC232	2	3	3	2.75
GossWiltAssocMap	3	15	91	2014	4F-342 CM 4	3	5	5	4.5
GossWiltAssocMap	3	15	93	2014	TX204	1	1	1	1
GossWiltAssocMap	3	15	95	2014	MS72	3	4	5	4
GossWiltAssocMap	3	15	97	2014	CH711-10	2	3	3	2.75
GossWiltAssocMap	3	15	99	2014	NO. 1201 INBRED	3	4	5	4
GossWiltAssocMap	3	15	101	2014	PHR62	1	2	2	1.75
GossWiltAssocMap	3	15	103	2014	PA405	1	1	2	1.25
GossWiltAssocMap	3	15	105	2014	H49	1	1	1	1
GossWiltAssocMap	3	15	107	2014	OC16	2	4	4	3.5
GossWiltAssocMap	3	15	109	2014	WXK44	1	1	1	1
GossWiltAssocMap	3	15	111	2014	VA16	2	3	3	2.75
GossWiltAssocMap	3	15	113	2014	WR3	2	4	4	3.5
GossWiltAssocMap	3	15	115	2014	S8326	1	2	2	1.75
GossWiltAssocMap	3	16	79	2014	AUSTRCF 306350	3	4	5	4
GossWiltAssocMap	3	16	81	2014	B14A	2	3	4	3
GossWiltAssocMap	3	16	83	2014	S 48	1	2	3	2
GossWiltAssocMap	3	16	85	2014	H45	1	2	2	1.75
GossWiltAssocMap	3	16	87	2014	N509	1	2	3	2
GossWiltAssocMap	3	16	89	2014	GE54	2	2	2	2
GossWiltAssocMap	3	16	91	2014	SG18	2	2	2	2
GossWiltAssocMap	3	16	93	2014	793	1	2	2	1.75
GossWiltAssocMap	3	16	95	2014	STRAIN 11D-586-68(A)	2	3	3	2.75
GossWiltAssocMap	3	16	97	2014	NY 428 (NEVEH YAAR)	2	3	3	2.75
GossWiltAssocMap	3	16	99	2014	LH127	2	3	3	2.75
GossWiltAssocMap	3	16	101	2014	YE-CHI-HUNG	3	4	5	4
GossWiltAssocMap	3	16	103	2014	VA26	2	2	2	2
GossWiltAssocMap	3	16	105	2014	H108	1	1	1	1
GossWiltAssocMap	3	16	107	2014	N6	3	3	3	3
GossWiltAssocMap	3	16	109	2014	PHG71	2	3	3	2.75
GossWiltAssocMap	3	16	111	2014	N543	2	3	3	2.75
GossWiltAssocMap	3	16	113	2014	PHW79	1	1	1	1
GossWiltAssocMap	3	16	115	2014	N501	2	2	2	2
GossWiltAssocMap	3	17	79	2014	A295	3	3	3	3
GossWiltAssocMap	3	17	81	2014	LH82	3	4	4	3.75
GossWiltAssocMap	3	17	83	2014	PHV78	1	1	1	1
GossWiltAssocMap	3	17	85	2014	MS224	1	1	1	1
GossWiltAssocMap	3	17	87	2014	LH145HT	3	4	6	4.25
GossWiltAssocMap	3	17	89	2014	B97	2	2	2	2
GossWiltAssocMap	3	17	91	2014	HY2	1	2	2	1.75
GossWiltAssocMap	3	17	93	2014	PHN29	3	5	7	5
GossWiltAssocMap	3	17	95	2014	78002A	2	3	4	3
GossWiltAssocMap	3	17	97	2014	B14A	2	3	3	2.75
GossWiltAssocMap	3	17	99	2014	T8445 INBRED	1	3	3	2.5
GossWiltAssocMap	3	17	101	2014	A632HT	4	5	5	4.75
GossWiltAssocMap	3	17	103	2014	MS80	1	1	1	1
GossWiltAssocMap	3	17	105	2014	VA18A	2	2	2	2
GossWiltAssocMap	3	17	107	2014	IA DS 53	3	3	3	3
GossWiltAssocMap	3	17	109	2014	T242	3	4	6	4.25
GossWiltAssocMap	3	17	111	2014	H98	2	2	2	2
GossWiltAssocMap	3	17	113	2014	790	2	2	2	2
GossWiltAssocMap	3	17	115	2014	OC14	1	2	2	1.75
GossWiltAssocMap	3	18	79	2014	FAPW	2	2	2	2
GossWiltAssocMap	3	18	81	2014	N28HT	3	4	5	4
GossWiltAssocMap	3	18	83	2014	B79	1	2	2	1.75
GossWiltAssocMap	3	18	85	2014	N505	3	4	4	3.75
GossWiltAssocMap	3	18	87	2014	NO. 1049 INBRED	3	4	5	4
GossWiltAssocMap	3	18	89	2014	LH119	2	2	2	2
GossWiltAssocMap	3	18	91	2014	LH128	1	1	1	1
GossWiltAssocMap	3	18	93	2014	5707	1	2	2	1.75
GossWiltAssocMap	3	18	95	2014	N72-3-1-1 INBRED	1	2	2	1.75
GossWiltAssocMap	3	18	97	2014	LH192	2	2	2	2
GossWiltAssocMap	3	18	99	2014	PHW52	2	2	2	2
GossWiltAssocMap	3	18	101	2014	PHJ31	2	2	2	2
GossWiltAssocMap	3	18	103	2014	IDS91	2	3	3	2.75
GossWiltAssocMap	3	18	105	2014	PA778	1	3	3	2.5
GossWiltAssocMap	3	18	107	2014	R181B	5	5	5	5
GossWiltAssocMap	3	18	109	2014	H103	4	4	4	4
GossWiltAssocMap	3	18	111	2014	CI 72	NA	NA	NA	NA
GossWiltAssocMap	3	18	113	2014	B14A	3	3	3	3
GossWiltAssocMap	3	18	115	2014	MS214	1	1	1	1
GossWiltAssocMap	3	19	79	2014	52220	1	1	1	1
GossWiltAssocMap	3	19	81	2014	R177	1	1	1	1
GossWiltAssocMap	3	19	83	2014	N192	3	4	5	4
GossWiltAssocMap	3	19	85	2014	LH220HT	3	4	4	3.75
GossWiltAssocMap	3	19	87	2014	SD63	2	2	2	2
GossWiltAssocMap	3	19	89	2014	A656	2	3	4	3
GossWiltAssocMap	3	19	91	2014	PA875	1	1	1	1
GossWiltAssocMap	3	19	93	2014	P39M96	1	2	2	1.75
GossWiltAssocMap	3	19	95	2014	W64A	2	2	2	2
GossWiltAssocMap	3	19	97	2014	W 3647	1	2	2	1.75
GossWiltAssocMap	3	19	99	2014	89S4125	2	2	2	2
GossWiltAssocMap	3	19	101	2014	A15-1 INBRED (POTCHEFSTROOM PEARL)	2	3	4	3
GossWiltAssocMap	3	19	103	2014	A239	2	3	3	2.75
GossWiltAssocMap	3	19	105	2014	NC372	1	2	3	2
GossWiltAssocMap	3	19	107	2014	NO. 1037 INBRED	1	1	1	1
GossWiltAssocMap	3	19	109	2014	AUSTRCF 306276	1	1	2	1.25
GossWiltAssocMap	3	19	111	2014	C410-1(F11) INBRED (HOTNOT CROSSES)	2	3	3	2.75
GossWiltAssocMap	3	19	113	2014	N216	3	3	3	3
GossWiltAssocMap	3	19	115	2014	YONG 28	3	4	5	4
GossWiltAssocMap	3	20	79	2014	I205	NA	NA	NA	NA
GossWiltAssocMap	3	20	81	2014	LH59	1	1	1	1
GossWiltAssocMap	3	20	83	2014	LH38	2	3	3	2.75
GossWiltAssocMap	3	20	85	2014	IL778D	1	1	1	1
GossWiltAssocMap	3	20	87	2014	WF9	1	1	1	1
GossWiltAssocMap	3	20	89	2014	NO. 1068 INBRED	3	4	5	4
GossWiltAssocMap	3	20	91	2014	B14A	2	3	3	2.75
GossWiltAssocMap	3	20	93	2014	H105W	3	5	6	4.75
GossWiltAssocMap	3	20	95	2014	A617	1	2	3	2
GossWiltAssocMap	3	20	97	2014	N521	1	3	3	2.5
GossWiltAssocMap	3	20	99	2014	N546	1	2	2	1.75
GossWiltAssocMap	3	20	101	2014	R154	2	3	3	2.75
GossWiltAssocMap	3	20	103	2014	B109	1	2	2	1.75
GossWiltAssocMap	3	20	105	2014	IA453	3	4	4	3.75
GossWiltAssocMap	3	20	107	2014	A632	4	4	4	4
GossWiltAssocMap	3	20	109	2014	LH51	1	1	1	1
GossWiltAssocMap	3	20	111	2014	PHM49	2	3	3	2.75
GossWiltAssocMap	3	20	113	2014	PA468	2	3	3	2.75
GossWiltAssocMap	3	20	115	2014	MO402	2	2	2	2
GossWiltAssocMap	3	21	79	2014	TX205	1	2	2	1.75
GossWiltAssocMap	3	21	81	2014	SD102	1	1	1	1
GossWiltAssocMap	3	21	83	2014	VA52	1	1	1	1
GossWiltAssocMap	3	21	85	2014	89S4083	2	3	3	2.75
GossWiltAssocMap	3	21	87	2014	B14A	2	3	3	2.75
GossWiltAssocMap	3	21	89	2014	2369	1	1	2	1.25
GossWiltAssocMap	3	21	91	2014	GT113	3	3	3	3
GossWiltAssocMap	3	21	93	2014	OH84	1	1	1	1
GossWiltAssocMap	3	21	95	2014	ENG-LI CHIH	1	1	1	1
GossWiltAssocMap	3	21	97	2014	LH208	1	2	2	1.75
GossWiltAssocMap	3	21	99	2014	A334	2	3	3	2.75
GossWiltAssocMap	3	21	101	2014	H84	1	1	1	1
GossWiltAssocMap	3	21	103	2014	P737M20	2	3	4	3
GossWiltAssocMap	3	21	105	2014	OC8	NA	NA	NA	NA
GossWiltAssocMap	3	21	107	2014	IDS28	2	3	3	2.75
GossWiltAssocMap	3	21	109	2014	TR	2	2	3	2.25
GossWiltAssocMap	3	21	111	2014	VA99	2	3	3	2.75
GossWiltAssocMap	3	21	113	2014	E8501	2	3	3	2.75
GossWiltAssocMap	3	21	115	2014	STRAIN T20-2-68(B)	2	3	3	2.75
GossWiltAssocMap	3	22	79	2014	(TWAN X TZUH)-S6	2	4	5	3.75
GossWiltAssocMap	3	22	81	2014	R159	2	3	3	2.75
GossWiltAssocMap	3	22	83	2014	A619HT	2	3	3	2.75
GossWiltAssocMap	3	22	85	2014	SD46	1	1	1	1
GossWiltAssocMap	3	22	87	2014	A678	1	3	3	2.5
GossWiltAssocMap	3	22	89	2014	MS81	2	2	2	2
GossWiltAssocMap	3	22	91	2014	B7	1	2	2	1.75
GossWiltAssocMap	3	22	93	2014	NS701	1	2	2	1.75
GossWiltAssocMap	3	22	95	2014	PHW43	3	3	3	3
GossWiltAssocMap	3	22	97	2014	EAST 028	1	2	3	2
GossWiltAssocMap	3	22	99	2014	MO1W	1	1	1	1
GossWiltAssocMap	3	22	101	2014	ND300	1	1	1	1
GossWiltAssocMap	3	22	103	2014	A664	3	4	6	4.25
GossWiltAssocMap	3	22	105	2014	NYLB31	2	3	3	2.75
GossWiltAssocMap	3	22	107	2014	AUSTRCF 306239	1	1	1	1
GossWiltAssocMap	3	22	109	2014	R2	2	3	3	2.75
GossWiltAssocMap	3	22	111	2014	IA CG4189	2	3	3	2.75
GossWiltAssocMap	3	22	113	2014	MO46	1	1	1	1
GossWiltAssocMap	3	22	115	2014	CHI-41	2	2	3	2.25
GossWiltAssocMap	3	23	79	2014	A645	2	3	3	2.75
GossWiltAssocMap	3	23	81	2014	OS420	1	2	2	1.75
GossWiltAssocMap	3	23	83	2014	PHW17	1	1	1	1
GossWiltAssocMap	3	23	85	2014	N551	1	1	1	1
GossWiltAssocMap	3	23	87	2014	PHT10	1	1	1	1
GossWiltAssocMap	3	23	89	2014	NO. 1266 INBRED	3	3	3	3
GossWiltAssocMap	3	23	91	2014	I29	2	3	3	2.75
GossWiltAssocMap	3	23	93	2014	794	2	3	3	2.75
GossWiltAssocMap	3	23	95	2014	H113	1	1	1	1
GossWiltAssocMap	3	23	97	2014	B76	2	2	2	2
GossWiltAssocMap	3	23	99	2014	NC292	1	1	2	1.25
GossWiltAssocMap	3	23	101	2014	PHM10	1	2	2	1.75
GossWiltAssocMap	3	23	103	2014	78371A	2	2	2	2
GossWiltAssocMap	3	23	105	2014	MS77	2	2	2	2
GossWiltAssocMap	3	23	107	2014	LH74	1	2	2	1.75
GossWiltAssocMap	3	23	109	2014	B14A	2	2	2	2
GossWiltAssocMap	3	23	111	2014	B100	1	1	1	1
GossWiltAssocMap	3	23	113	2014	VA102	1	1	1	1
GossWiltAssocMap	3	23	115	2014	89S4145	2	3	3	2.75
GossWiltAssocMap	3	24	79	2014	W 3607	1	2	3	2
GossWiltAssocMap	3	24	81	2014	P51	2	4	6	4
GossWiltAssocMap	3	24	83	2014	A260	1	3	4	2.75
GossWiltAssocMap	3	24	85	2014	N516	1	1	1	1
GossWiltAssocMap	3	24	87	2014	A208	1	1	1	1
GossWiltAssocMap	3	24	89	2014	H100	3	4	4	3.75
GossWiltAssocMap	3	24	91	2014	CH732-12	4	4	4	4
GossGwas	1	2	3	2015	N534	3	3	3	3
GossGwas	1	2	4	2015	90	NA	1	1	1
GossGwas	1	2	5	2015	ABPL 2	NA	NA	NA	NA
GossGwas	1	2	6	2015	MINN #5	3	4	6	4.25
GossGwas	1	2	7	2015	PHT10	NA	2	3	2.5
GossGwas	1	2	8	2015	AD SA13	NA	NA	NA	NA
GossGwas	1	2	9	2015	VA59	NA	NA	NA	NA
GossGwas	1	2	10	2015	B77	NA	3	3	3
GossGwas	1	2	11	2015	N505	2	NA	NA	NA
GossGwas	1	2	12	2015	AD SA7	2	NA	NA	NA
GossGwas	1	2	13	2015	T IEH 84	NA	NA	NA	NA
GossGwas	1	2	14	2015	DE811	3	NA	NA	NA
GossGwas	1	2	15	2015	W8304	3	2	2	2.25
GossGwas	1	2	16	2015	MO42	NA	3	5	4
GossGwas	1	2	17	2015	GE54	1	1	1	1
GossGwas	1	2	18	2015	N530	NA	NA	NA	NA
GossGwas	1	2	19	2015	N532	NA	NA	NA	NA
GossGwas	1	2	20	2015	CML326	NA	NA	NA	NA
GossGwas	1	2	21	2015	OC3	NA	NA	NA	NA
GossGwas	1	2	22	2015	IB014	4	4	4	4
GossGwas	1	2	23	2015	A680	2	3	4	3
GossGwas	1	2	24	2015	LH192	NA	NA	NA	NA
GossGwas	1	2	25	2015	NC364	1	1	1	1
GossGwas	1	2	26	2015	WXB6	NA	NA	NA	NA
GossGwas	1	2	27	2015	VA35	1	1	1	1
GossGwas	1	2	28	2015	LH59	NA	1	1	1
GossGwas	1	2	29	2015	PA376	NA	2	2	2
GossGwas	1	2	30	2015	B102	NA	NA	NA	NA
GossGwas	1	2	31	2015	PHW65	NA	1	1	1
GossGwas	1	2	32	2015	YONG 28	3	5	5	4.5
GossGwas	1	2	33	2015	MO47	4	4	4	4
GossGwas	1	2	34	2015	PHR47	2	2	3	2.25
GossGwas	1	2	35	2015	DAS4	2	2	4	2.5
GossGwas	1	2	36	2015	PA356	4	4	4	4
GossGwas	1	2	37	2015	DE4	2	2	2	2
GossGwas	1	2	38	2015	NC280	2	3	3	2.75
GossGwas	1	2	39	2015	B113	1	2	2	1.75
GossGwas	1	3	3	2015	R197	3	4	4	3.75
GossGwas	1	3	4	2015	C103	1	1	1	1
GossGwas	1	3	5	2015	B109	NA	NA	NA	NA
GossGwas	1	3	6	2015	MO49	NA	NA	NA	NA
GossGwas	1	3	7	2015	OC10	NA	3	7	5
GossGwas	1	3	8	2015	A334	1	1	1	1
GossGwas	1	3	9	2015	B100	1	1	1	1
GossGwas	1	3	10	2015	H84	1	NA	NA	NA
GossGwas	1	3	11	2015	WXK44	NA	NA	NA	NA
GossGwas	1	3	12	2015	IA 61	3	4	4	3.75
GossGwas	1	3	13	2015	AD SA2	3	3	3	3
GossGwas	1	3	14	2015	PA871	2	2	2	2
GossGwas	1	3	15	2015	H95	2	2	2	2
GossGwas	1	3	16	2015	NC372	2	3	4	3
GossGwas	1	3	17	2015	G80	1	1	1	1
GossGwas	1	3	18	2015	CH705-8	3	4	4	3.75
GossGwas	1	3	19	2015	H111	1	1	1	1
GossGwas	1	3	20	2015	B87	5	8	8	7.25
GossGwas	1	3	21	2015	I29	3	4	4	3.75
GossGwas	1	3	22	2015	H98	1	1	1	1
GossGwas	1	3	23	2015	AD SA11	2	2	2	2
GossGwas	1	3	24	2015	A628	3	4	5	4
GossGwas	1	3	25	2015	B164	1	1	1	1
GossGwas	1	3	26	2015	OC7	5	6	6	5.75
GossGwas	1	3	27	2015	T141	3	3	3	3
GossGwas	1	3	28	2015	A166	3	4	6	4.25
GossGwas	1	3	29	2015	PHT77	1	2	2	1.75
GossGwas	1	3	30	2015	AUSTRCF 306238	1	1	1	1
GossGwas	1	3	31	2015	PHT22	3	NA	NA	NA
GossGwas	1	3	32	2015	NC250	1	1	1	1
GossGwas	1	3	33	2015	DE1	NA	1	1	1
GossGwas	1	3	34	2015	NC232	3	3	3	3
GossGwas	1	3	35	2015	SA24	2	2	2	2
GossGwas	1	3	36	2015	OC14	1	1	1	1
GossGwas	1	3	37	2015	NC278A	1	1	1	1
GossGwas	1	3	38	2015	PA760	NA	NA	NA	NA
GossGwas	1	3	39	2015	PHJ33	1	1	1	1
GossGwas	1	4	3	2015	AUSTRCF 306306	2	3	3	2.75
GossGwas	1	4	4	2015	89S4083	3	3	3	3
GossGwas	1	4	5	2015	AD SA15	NA	NA	NA	NA
GossGwas	1	4	6	2015	B93	NA	NA	NA	NA
GossGwas	1	4	7	2015	VA52	3	3	3	3
GossGwas	1	4	8	2015	N7A	NA	2	2	2
GossGwas	1	4	9	2015	ND480	4	4	4	4
GossGwas	1	4	10	2015	TZU-CHIAO-HSI-WU 105	4	5	5	4.75
GossGwas	1	4	11	2015	W 3647	NA	NA	NA	NA
GossGwas	1	4	12	2015	H99	2	2	2	2
GossGwas	1	4	13	2015	NC262	1	1	1	1
GossGwas	1	4	14	2015	SEAGULL SEVENTEEN	1	1	1	1
GossGwas	1	4	15	2015	PA762	3	4	4	3.75
GossGwas	1	4	16	2015	NC310	2	3	4	3
GossGwas	1	4	17	2015	IBC2	1	1	1	1
GossGwas	1	4	18	2015	PHM49	NA	3	3	3
GossGwas	1	4	19	2015	N28HT	4	4	5	4.25
GossGwas	1	4	20	2015	4676A	2	3	4	3
GossGwas	1	4	21	2015	NC302	1	1	1	1
GossGwas	1	4	22	2015	MS68	2	2	2	2
GossGwas	1	4	23	2015	78004	3	4	4	3.75
GossGwas	1	4	24	2015	VA26	2	2	3	2.25
GossGwas	1	4	25	2015	SD46	1	1	1	1
GossGwas	1	4	26	2015	N216	3	3	3	3
GossGwas	1	4	27	2015	MS24	2	4	6	4
GossGwas	1	4	28	2015	MS214	1	1	1	1
GossGwas	1	4	29	2015	AD SA10	2	3	3	2.75
GossGwas	1	4	30	2015	MS71	NA	NA	NA	NA
GossGwas	1	4	31	2015	WD456	3	3	3	3
GossGwas	1	4	32	2015	A208	1	1	1	1
GossGwas	1	4	33	2015	HP301	NA	2	2	2
GossGwas	1	4	34	2015	VA17	1	1	1	1
GossGwas	1	4	35	2015	LH57	1	1	1	1
GossGwas	1	4	36	2015	STRAIN 11D-586-68(A)	NA	NA	NA	NA
GossGwas	1	4	37	2015	MO46	1	1	1	1
GossGwas	1	4	38	2015	H105W	NA	NA	NA	NA
GossGwas	1	4	39	2015	N533	NA	NA	3	3
GossGwas	1	5	3	2015	2369	1	1	1	1
GossGwas	1	5	4	2015	NC308	NA	NA	NA	NA
GossGwas	1	5	5	2015	WX33-16	2	2	2	2
GossGwas	1	5	6	2015	N199	1	1	1	1
GossGwas	1	5	7	2015	HP62-02	1	1	1	1
GossGwas	1	5	8	2015	PA759	NA	NA	NA	NA
GossGwas	1	5	9	2015	MBST	2	2	2	2
GossGwas	1	5	10	2015	K148	1	1	1	1
GossGwas	1	5	11	2015	LH205	2	2	3	2.25
GossGwas	1	5	12	2015	NC282	2	2	2	2
GossGwas	1	5	13	2015	B14A	3	4	4	3.75
GossGwas	1	5	14	2015	B79	3	4	4	3.75
GossGwas	1	5	15	2015	PA875	1	1	1	1
GossGwas	1	5	16	2015	NO. 1037 INBRED	2	2	2	2
GossGwas	1	5	17	2015	AD 188L	3	3	3	3
GossGwas	1	5	18	2015	N503	5	6	7	6
GossGwas	1	5	19	2015	WF9	2	2	3	2.25
GossGwas	1	5	20	2015	4N506	NA	2	2	2
GossGwas	1	5	21	2015	CHI-41	2	3	3	2.75
GossGwas	1	5	22	2015	2 KM 368 INBRED	1	1	1	1
GossGwas	1	5	23	2015	F2834T	2	2	2	2
GossGwas	1	5	24	2015	PHG86	2	2	3	2.25
GossGwas	1	5	25	2015	H126W	1	1	1	1
GossGwas	1	5	26	2015	B91	1	1	2	1.25
GossGwas	1	5	27	2015	IDS69	1	1	1	1
GossGwas	1	5	28	2015	R78	1	1	1	1
GossGwas	1	5	29	2015	794	2	3	4	3
GossGwas	1	5	30	2015	AB18	1	1	1	1
GossGwas	1	5	31	2015	NO. 1266 INBRED	2	3	3	2.75
GossGwas	1	5	32	2015	INBRED 309	4	5	5	4.75
GossGwas	1	5	33	2015	NO. 1068 INBRED	4	5	6	5
GossGwas	1	5	34	2015	HB8229	2	3	3	2.75
GossGwas	1	5	35	2015	AD 330	4	4	4	4
GossGwas	1	5	36	2015	H121	1	1	1	1
GossGwas	1	5	37	2015	MO15W	1	1	1	1
GossGwas	1	5	38	2015	89S4157	1	1	1	1
GossGwas	1	5	39	2015	B76	1	1	1	1
GossGwas	1	6	3	2015	AUSTRCF 306350	5	6	6	5.75
GossGwas	1	6	4	2015	NC254	1	1	2	1.25
GossGwas	1	6	5	2015	A15-1 INBRED (POTCHEFSTROOM PEARL)	3	4	4	3.75
GossGwas	1	6	6	2015	LH127	2	4	5	3.75
GossGwas	1	6	7	2015	S8326	2	2	2	2
GossGwas	1	6	8	2015	A619	2	3	3	2.75
GossGwas	1	6	9	2015	B116	1	1	1	1
GossGwas	1	6	10	2015	PHG35	NA	NA	NA	NA
GossGwas	1	6	11	2015	AUSTRCF 305836	NA	NA	NA	NA
GossGwas	1	6	12	2015	AUSTRCF 306333	NA	NA	NA	NA
GossGwas	1	6	13	2015	LH190	3	3	4	3.25
GossGwas	1	6	14	2015	OS420	2	2	2	2
GossGwas	1	6	15	2015	L	2	4	4	3.5
GossGwas	1	6	16	2015	AD SA8	1	1	1	1
GossGwas	1	6	17	2015	AD 104 DS	1	1	1	1
GossGwas	1	6	18	2015	HBA1	2	3	3	2.75
GossGwas	1	6	19	2015	OH40B	1	3	3	2.5
GossGwas	1	6	20	2015	NC270	1	1	1	1
GossGwas	1	6	21	2015	AD 352	4	6	7	5.75
GossGwas	1	6	22	2015	PHW52	2	2	3	2.25
GossGwas	1	6	23	2015	LH132	1	2	2	1.75
GossGwas	1	6	24	2015	CML365	1	1	1	1
GossGwas	1	6	25	2015	H108	1	1	1	1
GossGwas	1	6	26	2015	IBB14	1	1	1	1
GossGwas	1	6	27	2015	J8606	1	2	3	2
GossGwas	1	6	28	2015	CO258	1	1	1	1
GossGwas	1	6	29	2015	R113	1	1	1	1
GossGwas	1	6	30	2015	R2	3	4	5	4
GossGwas	1	6	31	2015	PHR36	1	1	1	1
GossGwas	1	6	32	2015	PHN82	1	2	2	1.75
GossGwas	1	6	33	2015	CML211	4	5	5	4.75
GossGwas	1	6	34	2015	VA99	2	3	3	2.75
GossGwas	1	6	35	2015	H100	4	4	4	4
GossGwas	1	6	36	2015	2MA22	NA	NA	NA	NA
GossGwas	1	6	37	2015	MS211	1	2	2	1.75
GossGwas	1	6	38	2015	N509	1	1	3	1.5
GossGwas	1	6	39	2015	PHK42	NA	NA	NA	NA
GossGwas	1	7	3	2015	SD102	1	2	2	1.75
GossGwas	1	7	4	2015	B-15 DENT STERILE	4	4	4	4
GossGwas	1	7	5	2015	ENG-LI CHIH	2	2	2	2
GossGwas	1	7	6	2015	PHW43	3	3	3	3
GossGwas	1	7	7	2015	NO. 1049 INBRED	3	4	4	3.75
GossGwas	1	7	8	2015	H107	1	1	1	1
GossGwas	1	7	9	2015	52220	1	1	1	1
GossGwas	1	7	10	2015	B70	1	3	3	2.5
GossGwas	1	7	11	2015	B111	2	2	2	2
GossGwas	1	7	12	2015	N192	4	5	5	4.75
GossGwas	1	7	13	2015	PA405	1	1	1	1
GossGwas	1	7	14	2015	A632RPRP	4	4	4	4
GossGwas	1	7	15	2015	790	NA	2	2	2
GossGwas	1	7	16	2015	AD 402 DS	NA	NA	NA	NA
GossGwas	1	7	17	2015	LH119	2	3	4	3
GossGwas	1	7	18	2015	WR3	2	4	6	4
GossGwas	1	7	19	2015	NO. 1070 INBRED	3	4	6	4.25
GossGwas	1	7	20	2015	A14NW	4	6	6	5.5
GossGwas	1	7	21	2015	MO45	2	3	3	2.75
GossGwas	1	7	22	2015	H109	1	1	1	1
GossGwas	1	7	23	2015	R101	3	4	4	3.75
GossGwas	1	7	24	2015	FBHJ	2	2	2	2
GossGwas	1	7	25	2015	T62S	1	2	3	2
GossGwas	1	7	26	2015	A664	3	4	5	4
GossGwas	1	7	27	2015	T8	1	1	1	1
GossGwas	1	7	28	2015	VA102	1	1	1	1
GossGwas	1	7	29	2015	MO48	3	4	4	3.75
GossGwas	1	7	30	2015	IL778D	1	1	1	1
GossGwas	1	7	31	2015	PHR62	1	1	1	1
GossGwas	1	7	32	2015	NC288	1	1	1	1
GossGwas	1	7	33	2015	MS72	2	4	5	3.75
GossGwas	1	7	34	2015	AD SA19	1	1	1	1
GossGwas	1	7	35	2015	B-WHO-201	2	3	3	2.75
GossGwas	1	7	36	2015	4581 INBRED	1	1	1	1
GossGwas	1	7	37	2015	B73	2	3	4	3
GossGwas	1	7	38	2015	N543	2	2	2	2
GossGwas	1	7	39	2015	IBB15	1	1	1	1
GossGwas	1	8	3	2015	OC12	2	3	3	2.75
GossGwas	1	8	4	2015	B14	3	3	3	3
GossGwas	1	8	5	2015	CI 72	1	1	1	1
GossGwas	1	8	6	2015	FAPW	2	2	2	2
GossGwas	1	8	7	2015	AD SA5	NA	1	1	1
GossGwas	1	8	8	2015	R181B	4	7	7	6.25
GossGwas	1	8	9	2015	B14A	NA	NA	NA	NA
GossGwas	1	8	10	2015	LH220HT	4	5	6	5
GossGwas	1	8	11	2015	K55	1	1	1	1
GossGwas	1	8	12	2015	A644	NA	NA	NA	NA
GossGwas	1	8	13	2015	H103	3	3	3	3
GossGwas	1	8	14	2015	PHH93	NA	NA	3	3
GossGwas	1	8	15	2015	B99	1	2	2	1.75
GossGwas	1	8	16	2015	TX204	1	1	1	1
GossGwas	1	8	17	2015	B97	1	1	1	1
GossGwas	1	8	18	2015	OC16	3	3	3	3
GossGwas	1	8	19	2015	H8431	NA	NA	NA	NA
GossGwas	1	8	20	2015	W572	NA	NA	NA	NA
GossGwas	1	8	21	2015	W 3607	2	2	2	2
GossGwas	1	8	22	2015	NC262A	1	1	1	1
GossGwas	1	8	23	2015	INBRED 34-1141	6	8	8	7.5
GossGwas	1	8	24	2015	CI45	1	1	1	1
GossGwas	1	8	25	2015	AD SA12	1	1	1	1
GossGwas	1	8	26	2015	N529	NA	NA	NA	NA
GossGwas	1	8	27	2015	N513	1	1	1	1
GossGwas	1	8	28	2015	LH194	1	2	2	1.75
GossGwas	1	8	29	2015	LH51	1	1	1	1
GossGwas	1	8	30	2015	W64A	NA	2	2	2
GossGwas	1	8	31	2015	NC292	1	1	1	1
GossGwas	1	8	32	2015	LH123HT	3	3	3	3
GossGwas	1	8	33	2015	T8445 INBRED	1	1	NA	1
GossGwas	1	8	34	2015	AR214	NA	NA	NA	NA
GossGwas	1	8	35	2015	A617	NA	NA	NA	NA
GossGwas	1	8	36	2015	AUSTRCF 306239	1	1	1	1
GossGwas	1	8	37	2015	78010	1	NA	NA	NA
GossGwas	1	8	38	2015	PHG83	1	1	1	1
GossGwas	1	8	39	2015	WXI198	3	3	3	3
GossGwas	1	9	3	2015	A678	2	2	3	2.25
GossGwas	1	9	4	2015	AD SA16	NA	NA	NA	NA
GossGwas	1	9	5	2015	B85	NA	NA	NA	NA
GossGwas	1	9	6	2015	PHW17	1	1	1	1
GossGwas	1	9	7	2015	PHW79	1	1	1	1
GossGwas	1	9	8	2015	PHV78	1	1	1	1
GossGwas	1	9	9	2015	B-4541	NA	NA	NA	NA
GossGwas	1	9	10	2015	GT113	3	3	3	3
GossGwas	1	9	11	2015	SD41	2	4	4	3.5
GossGwas	1	9	12	2015	OH84	NA	NA	NA	NA
GossGwas	1	9	13	2015	OH603	1	1	1	1
GossGwas	1	9	14	2015	B-28	2	4	4	3.5
GossGwas	1	9	15	2015	LH93	1	1	1	1
GossGwas	1	9	16	2015	AD 11 DS	3	4	5	4
GossGwas	1	9	17	2015	CH157	3	4	5	4
GossGwas	1	9	18	2015	E205-1-1-1 INBRED (S5 SYN. ANVELD)	2	2	2	2
GossGwas	1	9	19	2015	R71	4	5	5	4.75
GossGwas	1	9	20	2015	P737M20	NA	NA	NA	NA
GossGwas	1	9	21	2015	M14	1	2	2	1.75
GossGwas	1	9	22	2015	PHK35	1	1	1	1
GossGwas	1	9	23	2015	MO402	2	2	2	2
GossGwas	1	9	24	2015	FR19	3	3	3	3
GossGwas	1	9	25	2015	A401	2	3	4	3
GossGwas	1	9	26	2015	A663	1	2	2	1.75
GossGwas	1	9	27	2015	IA DS 61	1	1	1	1
GossGwas	1	9	28	2015	AUSTRCF 306348	3	3	3	3
GossGwas	1	9	29	2015	NC344	1	1	1	1
GossGwas	1	9	30	2015	PHG29	NA	1	1	1
GossGwas	1	9	31	2015	B46	NA	NA	NA	NA
GossGwas	1	9	32	2015	VA22	1	1	1	1
GossGwas	1	9	33	2015	TX205	1	1	1	1
GossGwas	1	9	34	2015	AD SA4	4	4	4	4
GossGwas	1	9	35	2015	LH82	3	3	3	3
GossGwas	1	9	36	2015	N552	1	1	1	1
GossGwas	1	9	37	2015	DAS2	1	1	1	1
GossGwas	1	9	38	2015	AD 188L DS	2	4	4	3.5
GossGwas	1	9	39	2015	A660	NA	NA	NA	NA
GossGwas	1	10	3	2015	PB80	1	1	1	1
GossGwas	1	10	4	2015	AD SA17	NA	NA	NA	NA
GossGwas	1	10	5	2015	LH193	1	2	3	2
GossGwas	1	10	6	2015	N523	2	1	1	1.25
GossGwas	1	10	7	2015	B47	1	1	1	1
GossGwas	1	10	8	2015	B57	3	3	3	3
GossGwas	1	10	9	2015	NC290	1	1	1	1
GossGwas	1	10	10	2015	4F-259 HQ	3	3	4	3.25
GossGwas	1	10	11	2015	A625	3	4	4	3.75
GossGwas	1	10	12	2015	K150	3	4	4	3.75
GossGwas	1	10	13	2015	B106	1	1	1	1
GossGwas	1	10	14	2015	PHT60	2	2	2	2
GossGwas	1	10	15	2015	L317	2	3	3	2.75
GossGwas	1	10	16	2015	T226	3	3	3	3
GossGwas	1	10	17	2015	B107	NA	NA	NA	NA
GossGwas	1	10	18	2015	NC286	NA	NA	NA	NA
GossGwas	1	10	19	2015	H113	2	2	2	2
GossGwas	1	10	20	2015	LP1 CMS HT	NA	NA	NA	NA
GossGwas	1	10	21	2015	B55	2	2	2	2
GossGwas	1	10	22	2015	SD10	NA	NA	NA	NA
GossGwas	1	10	23	2015	R177	1	1	1	1
GossGwas	1	10	24	2015	PA877	1	1	1	1
GossGwas	1	10	25	2015	H93	1	1	1	1
GossGwas	1	10	26	2015	N524	1	1	1	1
GossGwas	1	10	27	2015	DAS1	3	4	5	4
GossGwas	1	10	28	2015	C123	NA	NA	NA	NA
GossGwas	1	10	29	2015	LH128	1	1	1	1
GossGwas	1	10	30	2015	N551	1	1	1	1
GossGwas	1	10	31	2015	NY6371	4	5	5	4.75
GossGwas	1	10	32	2015	A295	1	1	3	1.5
GossGwas	1	10	33	2015	MBPM	1	1	1	1
GossGwas	1	10	34	2015	B14A	3	3	3	3
GossGwas	1	10	35	2015	A627	3	4	5	4
GossGwas	1	10	36	2015	H45	2	2	2	2
GossGwas	1	10	37	2015	AD 284	3	4	4	3.75
GossGwas	1	10	38	2015	R168	1	1	1	1
GossGwas	1	10	39	2015	B114	1	1	1	1
GossGwas	1	11	3	2015	AD SG1501	NA	1	1	1
GossGwas	1	11	4	2015	B59	4	4	5	4.25
GossGwas	1	11	5	2015	MS221	1	1	1	1
GossGwas	1	11	6	2015	B94	3	3	3	3
GossGwas	1	11	7	2015	PA91	1	1	1	1
GossGwas	1	11	8	2015	4F-342 CM 4	NA	NA	NA	NA
GossGwas	1	11	9	2015	IA DS 53	NA	3	3	3
GossGwas	1	11	10	2015	SD44	NA	NA	NA	NA
GossGwas	1	11	11	2015	N502	NA	NA	NA	NA
GossGwas	1	11	12	2015	89S4125	3	3	3	3
GossGwas	1	11	13	2015	PHM10	NA	1	1	1
GossGwas	1	11	14	2015	H112	1	1	1	1
GossGwas	1	11	15	2015	MDF-13D	1	1	1	1
GossGwas	1	11	16	2015	A686SU	4	4	5	4.25
GossGwas	1	11	17	2015	N209	NA	NA	NA	NA
GossGwas	1	11	18	2015	E8501	3	4	4	3.75
GossGwas	1	11	19	2015	ND300	NA	NA	NA	NA
GossGwas	1	11	20	2015	CI 75	1	1	1	1
GossGwas	1	11	21	2015	T232	NA	NA	NA	NA
GossGwas	1	11	22	2015	H114	NA	NA	NA	NA
GossGwas	1	11	23	2015	MS57	NA	NA	NA	NA
GossGwas	1	11	24	2015	A305	NA	NA	NA	NA
GossGwas	1	11	25	2015	IDS28	NA	NA	NA	NA
GossGwas	1	11	26	2015	B105	1	1	1	1
GossGwas	1	11	27	2015	AD H10	NA	NA	NA	NA
GossGwas	1	11	28	2015	N801W	NA	NA	NA	NA
GossGwas	1	11	29	2015	NC330	NA	NA	NA	NA
GossGwas	1	11	30	2015	B37	NA	NA	NA	NA
GossGwas	1	11	31	2015	CML456	3	3	3	3
GossGwas	1	11	32	2015	LH60	1	1	1	1
GossGwas	1	11	33	2015	A636	NA	NA	NA	NA
GossGwas	1	11	34	2015	B73HTRHM	1	2	2	1.75
GossGwas	1	11	35	2015	SG18	1	1	1	1
GossGwas	1	11	36	2015	MO512BW	2	3	3	2.75
GossGwas	1	11	37	2015	PHZ51	1	1	1	1
GossGwas	1	11	38	2015	AD SA21	NA	NA	NA	NA
GossGwas	1	11	39	2015	PHP55	3	3	3	3
GossGwas	1	12	3	2015	C410-1(F11) INBRED (HOTNOT CROSSES)	NA	NA	NA	NA
GossGwas	1	12	4	2015	B14A	3	4	4	3.75
GossGwas	1	12	5	2015	VAW6	NA	NA	NA	NA
GossGwas	1	12	6	2015	PHG50	1	1	1	1
GossGwas	1	12	7	2015	A258	NA	NA	NA	NA
GossGwas	1	12	8	2015	NP86	NA	NA	NA	NA
GossGwas	1	12	9	2015	PA468	3	3	3	3
GossGwas	1	12	10	2015	MS224	1	1	1	1
GossGwas	1	12	11	2015	P51	4	5	6	5
GossGwas	1	12	12	2015	MS77	3	3	3	3
GossGwas	1	12	13	2015	A643	NA	NA	NA	NA
GossGwas	1	12	14	2015	NC284	NA	NA	NA	NA
GossGwas	1	12	15	2015	MS132	NA	NA	NA	NA
GossGwas	1	12	16	2015	DAS3	1	1	1	1
GossGwas	1	12	17	2015	SD63	1	1	1	1
GossGwas	1	12	18	2015	PA778	NA	NA	NA	NA
GossGwas	1	12	19	2015	MS226	4	4	4	4
GossGwas	1	12	20	2015	MS203	2	3	3	2.75
GossGwas	1	12	21	2015	B41	2	2	3	2.25
GossGwas	1	12	22	2015	IA CG4189	2	2	2	2
GossGwas	1	12	23	2015	A619HT	3	3	3	3
GossGwas	1	12	24	2015	AD 347 DS-1	NA	NA	NA	NA
GossGwas	1	12	25	2015	A681	NA	NA	NA	NA
GossGwas	1	12	26	2015	SD40	1	1	1	1
GossGwas	1	12	27	2015	N501	1	1	1	1
GossGwas	1	12	28	2015	N200	1	1	1	1
GossGwas	1	12	29	2015	B14A	NA	NA	NA	NA
GossGwas	1	12	30	2015	LH195	1	1	1	1
GossGwas	1	12	31	2015	11430	NA	NA	NA	NA
GossGwas	1	12	32	2015	B89	NA	NA	NA	NA
GossGwas	1	12	33	2015	NP87	1	NA	NA	NA
GossGwas	1	12	34	2015	IA453	3	4	4	3.75
GossGwas	1	12	35	2015	B67	1	1	1	1
GossGwas	1	12	36	2015	A260	2	3	3	2.75
GossGwas	1	12	37	2015	H104W	NA	NA	NA	NA
GossGwas	1	12	38	2015	A670	6	7	7	6.75
GossGwas	1	12	39	2015	207	1	1	2	1.25
GossGwas	1	13	3	2015	OC5	4	4	5	4.25
GossGwas	1	13	4	2015	AUSTRCF 306276	1	1	1	1
GossGwas	1	13	5	2015	LH65	1	1	1	1
GossGwas	1	13	6	2015	A632HTN	4	5	5	4.75
GossGwas	1	13	7	2015	MS81	2	2	2	2
GossGwas	1	13	8	2015	IA DS 62	3	3	3	3
GossGwas	1	13	9	2015	PHG71	3	4	4	3.75
GossGwas	1	13	10	2015	B73HT	NA	NA	NA	NA
GossGwas	1	13	11	2015	A656	NA	NA	NA	NA
GossGwas	1	13	12	2015	89S4145	3	4	4	3.75
GossGwas	1	13	13	2015	EAST 028	NA	NA	NA	NA
GossGwas	1	13	14	2015	R802A	NA	NA	NA	NA
GossGwas	1	13	15	2015	R103	NA	NA	NA	NA
GossGwas	1	13	16	2015	LH1	NA	NA	NA	NA
GossGwas	1	13	17	2015	MBNA	3	3	5	3.5
GossGwas	1	13	18	2015	AD 440 DS-1	2	2	2	2
GossGwas	1	13	19	2015	AD SA9	2	2	2	2
GossGwas	1	13	20	2015	A645	5	5	6	5.25
GossGwas	1	13	21	2015	ML606	NA	NA	NA	NA
GossGwas	1	13	22	2015	NYRD4058	NA	1	1	1
GossGwas	1	13	23	2015	CH711-10	NA	NA	NA	NA
GossGwas	1	13	24	2015	PHK29	1	1	1	1
GossGwas	1	13	25	2015	PHG84	NA	1	1	1
GossGwas	1	13	26	2015	N6	1	1	1	1
GossGwas	1	13	27	2015	H49	1	1	1	1
GossGwas	1	13	28	2015	CO256	1	1	1	1
GossGwas	1	13	29	2015	MS223	NA	NA	NA	NA
GossGwas	1	13	30	2015	GT119	NA	NA	NA	NA
GossGwas	1	13	31	2015	78551S	1	1	1	1
GossGwas	1	13	32	2015	AD SA18	NA	NA	NA	NA
GossGwas	1	13	33	2015	R159	NA	NA	NA	NA
GossGwas	1	13	34	2015	AD SA20	2	2	2	2
GossGwas	1	13	35	2015	PHJ31	1	1	1	1
GossGwas	1	13	36	2015	TR	2	2	2	2
GossGwas	1	15	37	2015	A634	4	5	6	5
GossGwas	1	15	38	2015	AD 221	2	4	5	3.75
GossGwas	1	15	39	2015	B14A	4	4	4	4
GossGwas	1	16	3	2015	H123	NA	NA	NA	NA
GossGwas	1	16	4	2015	W22	NA	NA	NA	NA
GossGwas	1	16	5	2015	87916W	1	1	1	1
GossGwas	1	16	6	2015	MS116	NA	NA	NA	NA
GossGwas	1	16	7	2015	OH56A	1	3	3	2.5
GossGwas	1	16	8	2015	OH43	NA	4	4	4
GossGwas	1	16	9	2015	MS80	NA	NA	NA	NA
GossGwas	1	16	10	2015	IA DS 43-W	NA	NA	NA	NA
GossGwas	1	16	11	2015	AD 157 DS	5	5	5	5
GossGwas	1	16	12	2015	VA91	NA	NA	NA	NA
GossGwas	1	16	13	2015	S 48	NA	NA	NA	NA
GossGwas	1	16	14	2015	A659	4	4	4	4
GossGwas	1	16	15	2015	MS200	3	NA	NA	NA
GossGwas	1	16	16	2015	LH196	1	NA	NA	NA
GossGwas	1	16	17	2015	NS701	NA	2	3	2.5
GossGwas	1	16	18	2015	H106W	NA	1	1	1
GossGwas	1	16	19	2015	R109B	NA	NA	NA	NA
GossGwas	1	16	20	2015	LH39	NA	NA	NA	NA
GossGwas	1	16	21	2015	N201	NA	NA	NA	NA
GossGwas	1	16	22	2015	AD 26 DS	NA	NA	NA	NA
GossGwas	1	16	23	2015	WIL901	NA	NA	NA	NA
GossGwas	1	16	24	2015	PHN73	NA	NA	NA	NA
GossGwas	1	16	25	2015	B92	1	1	1	1
GossGwas	1	16	26	2015	PHN29	1	1	1	1
GossGwas	1	16	27	2015	OH422	1	1	1	1
GossGwas	1	16	28	2015	DJ7	1	2	2	1.75
GossGwas	1	16	29	2015	LH74	NA	1	1	1
GossGwas	1	16	30	2015	78371A	1	1	1	1
GossGwas	1	16	31	2015	N516	1	1	1	1
GossGwas	1	16	32	2015	BEI 10 = NORTH 10	NA	NA	NA	NA
GossGwas	1	16	33	2015	MS100	NA	NA	NA	NA
GossGwas	1	16	34	2015	CH732-12	4	4	5	4.25
GossGwas	1	16	35	2015	CA-4	NA	NA	1	1
GossGwas	1	16	36	2015	MO1W	1	1	1	1
GossGwas	1	16	37	2015	NY 428 (NEVEH YAAR)	1	1	1	1
GossGwas	1	16	38	2015	YE-CHI-HUNG	3	5	5	4.5
GossGwas	1	16	39	2015	6M502	2	2	2	2
GossGwas	1	17	3	2015	R154	NA	NA	NA	NA
GossGwas	1	17	4	2015	NC290A	NA	NA	NA	NA
GossGwas	1	17	5	2015	PHP02	3	4	4	3.75
GossGwas	1	17	6	2015	R906	2	2	2	2
GossGwas	1	17	7	2015	N521	1	NA	NA	NA
GossGwas	1	17	8	2015	MO17	1	1	1	1
GossGwas	1	17	9	2015	N546	NA	NA	NA	NA
GossGwas	1	17	10	2015	AUSTRCF 306336	NA	NA	NA	NA
GossGwas	1	17	11	2015	793	NA	NA	NA	NA
GossGwas	1	17	12	2015	AD SA3	NA	2	2	2
GossGwas	1	17	13	2015	792	2	2	3	2.25
GossGwas	1	17	14	2015	NC342	1	1	1	1
GossGwas	1	17	15	2015	IDS91	NA	2	2	2
GossGwas	1	17	16	2015	2FACC	NA	3	3	3
GossGwas	1	17	17	2015	A548	NA	3	NA	3
GossGwas	1	17	18	2015	NC252	2	3	4	3
GossGwas	1	17	19	2015	WIL903	NA	NA	NA	NA
GossGwas	1	17	20	2015	A239	4	4	4	4
GossGwas	1	17	21	2015	A635	4	4	4	4
GossGwas	1	17	22	2015	OS426	1	NA	NA	NA
GossGwas	1	17	23	2015	PHN11	NA	NA	NA	NA
GossGwas	1	17	24	2015	LH208	NA	NA	NA	NA
GossGwas	1	17	25	2015	CI 20	NA	NA	NA	NA
GossGwas	1	17	26	2015	H73	NA	NA	NA	NA
GossGwas	1	17	27	2015	N72-3-1-1 INBRED	NA	NA	NA	NA
GossGwas	1	17	28	2015	LP1 NR HT	3	3	3	3
GossGwas	1	17	29	2015	A632	3	4	4	3.75
GossGwas	1	17	30	2015	NC256	NA	NA	NA	NA
GossGwas	1	17	31	2015	AD 370	NA	NA	NA	NA
GossGwas	1	17	32	2015	B108	NA	NA	NA	NA
GossGwas	1	17	33	2015	F39	NA	NA	NA	NA
GossGwas	1	17	34	2015	PHJ70	1	1	1	1
GossGwas	1	17	35	2015	Q381	NA	NA	NA	NA
GossGwas	1	17	36	2015	B88	NA	NA	NA	NA
GossGwas	1	17	37	2015	A302-1-2(S10) INBRED (SERVENTINA)	4	4	4	4
GossGwas	1	17	38	2015	NC278	1	1	1	1
GossGwas	1	17	39	2015	R4	1	NA	NA	NA
GossGwas	1	18	3	2015	N217	NA	NA	NA	NA
GossGwas	1	18	4	2015	78002A	NA	NA	NA	NA
GossGwas	1	18	5	2015	A632HT	NA	NA	NA	NA
GossGwas	1	18	6	2015	OH33	NA	NA	NA	NA
GossGwas	1	18	7	2015	YING-55	NA	NA	NA	NA
GossGwas	1	18	8	2015	PHW20	NA	NA	NA	NA
GossGwas	1	18	9	2015	PHG39	1	1	2	1.25
GossGwas	1	18	10	2015	740	1	1	1	1
GossGwas	1	18	11	2015	VA85	1	1	1	1
GossGwas	1	18	12	2015	PHT55	NA	NA	NA	NA
GossGwas	1	18	13	2015	R221	1	1	1	1
GossGwas	1	18	14	2015	AD 233	4	5	5	4.75
GossGwas	1	18	15	2015	A671	1	3	3	2.5
GossGwas	1	18	16	2015	SG 30A	NA	NA	NA	NA
GossGwas	1	18	17	2015	(TWAN X TZUH)-S6	NA	NA	NA	NA
GossGwas	1	18	18	2015	NC328	1	1	2	1.25
GossGwas	1	18	19	2015	GA220	5	4	4	4.25
GossGwas	1	18	20	2015	NC260	NA	NA	NA	NA
GossGwas	1	18	21	2015	CI90C	NA	NA	NA	NA
GossGwas	1	18	22	2015	764	NA	NA	NA	NA
GossGwas	1	18	23	2015	I205	NA	NA	NA	NA
GossGwas	1	18	24	2015	VA18A	NA	NA	NA	NA
GossGwas	1	18	25	2015	AD SA14	NA	NA	NA	NA
GossGwas	1	18	26	2015	5707	NA	NA	NA	NA
GossGwas	1	18	27	2015	AD 363-1	NA	NA	NA	NA
GossGwas	1	18	28	2015	SD42	NA	NA	NA	NA
GossGwas	1	18	29	2015	B75	1	1	1	1
GossGwas	1	18	30	2015	A251	NA	NA	NA	NA
GossGwas	1	18	31	2015	T242	2	3	3	2.75
GossGwas	1	18	32	2015	MS215	1	1	1	1
GossGwas	1	18	33	2015	LH38	2	2	NA	2
GossGwas	1	18	34	2015	IL677A	NA	NA	NA	NA
GossGwas	1	18	35	2015	CML116	NA	NA	NA	NA
GossGwas	1	18	36	2015	CH741-6	2	5	5	4.25
GossGwas	1	18	37	2015	RB-15 DENT STERILE	NA	NA	NA	NA
GossGwas	1	18	38	2015	AD 316 DS	NA	NA	NA	NA
GossGwas	1	18	39	2015	NYLB31	NA	NA	NA	NA
GossGwas	2	2	40	2015	A258	2	4	6	4
GossGwas	2	2	41	2015	OH40B	1	3	3	2.5
GossGwas	2	2	42	2015	PHT77	1	1	3	1.5
GossGwas	2	2	43	2015	CO258	1	1	1	1
GossGwas	2	2	44	2015	VA52	1	2	2	1.75
GossGwas	2	2	45	2015	VA99	2	3	3	2.75
GossGwas	2	2	46	2015	A634	3	4	4	3.75
GossGwas	2	2	47	2015	RB-15 DENT STERILE	3	6	6	5.25
GossGwas	2	2	48	2015	ENG-LI CHIH	1	1	1	1
GossGwas	2	2	49	2015	A208	1	2	2	1.75
GossGwas	2	2	50	2015	SA24	1	2	2	1.75
GossGwas	2	2	51	2015	N503	2	3	3	2.75
GossGwas	2	2	52	2015	NC342	1	1	1	1
GossGwas	2	2	53	2015	B77	2	2	2	2
GossGwas	2	2	54	2015	IA DS 62	2	3	3	2.75
GossGwas	2	2	55	2015	5707	1	1	1	1
GossGwas	2	2	56	2015	A656	3	3	3	3
GossGwas	2	2	57	2015	AD SA11	1	1	1	1
GossGwas	2	2	58	2015	B100	1	1	1	1
GossGwas	2	2	59	2015	CH741-6	1	3	3	2.5
GossGwas	2	2	60	2015	N534	NA	NA	NA	NA
GossGwas	2	2	61	2015	YONG 28	3	7	7	6
GossGwas	2	2	62	2015	NC286	NA	NA	NA	NA
GossGwas	2	2	63	2015	VA17	1	1	1	1
GossGwas	2	2	64	2015	NC284	1	3	4	2.75
GossGwas	2	2	65	2015	N551	1	1	1	1
GossGwas	2	2	66	2015	MS200	2	3	3	2.75
GossGwas	2	2	67	2015	N502	3	5	5	4.5
GossGwas	2	2	68	2015	WX33-16	1	1	1	1
GossGwas	2	2	69	2015	LH57	1	1	1	1
GossGwas	2	2	70	2015	LH39	2	4	4	3.5
GossGwas	2	2	71	2015	IA CG4189	NA	NA	NA	NA
GossGwas	2	2	72	2015	MS214	1	2	2	1.75
GossGwas	2	2	73	2015	H103	2	5	5	4.25
GossGwas	2	2	74	2015	IA DS 43-W	1	2	2	1.75
GossGwas	2	2	75	2015	PA759	3	4	4	3.75
GossGwas	2	2	76	2015	B46	NA	NA	NA	NA
GossGwas	2	2	77	2015	N192	1	2	3	2
GossGwas	2	3	40	2015	R103	1	2	3	2
GossGwas	2	3	41	2015	IBB15	1	2	2	1.75
GossGwas	2	3	42	2015	793	1	2	2	1.75
GossGwas	2	3	43	2015	IBB14	2	2	3	2.25
GossGwas	2	3	44	2015	PA778	NA	NA	NA	NA
GossGwas	2	3	45	2015	TR	1	2	2	1.75
GossGwas	2	3	46	2015	A334	1	3	7	3.5
GossGwas	2	3	47	2015	YE-CHI-HUNG	2	4	4	3.5
GossGwas	2	3	48	2015	LH82	2	4	4	3.5
GossGwas	2	3	49	2015	PHT10	1	1	1	1
GossGwas	2	3	50	2015	B14	1	3	4	2.75
GossGwas	2	3	51	2015	WR3	3	5	5	4.5
GossGwas	2	3	52	2015	N501	1	1	1	1
GossGwas	2	3	53	2015	SD10	3	4	5	4
GossGwas	2	3	54	2015	B85	1	1	1	1
GossGwas	2	3	55	2015	NC292	1	2	3	2
GossGwas	2	3	56	2015	IL677A	1	1	1	1
GossGwas	2	3	57	2015	B91	1	2	2	1.75
GossGwas	2	3	58	2015	AD SA3	1	3	3	2.5
GossGwas	2	3	59	2015	VA102	1	1	1	1
GossGwas	2	3	60	2015	IBC2	1	1	2	1.25
GossGwas	2	3	61	2015	P737M20	1	2	3	2
GossGwas	2	3	62	2015	R159	1	1	1	1
GossGwas	2	3	63	2015	LH205	1	2	2	1.75
GossGwas	2	3	64	2015	AD SA9	1	2	2	1.75
GossGwas	2	3	65	2015	R2	3	5	6	4.75
GossGwas	2	3	66	2015	A619HT	3	4	4	3.75
GossGwas	2	3	67	2015	CH711-10	2	3	3	2.75
GossGwas	2	3	68	2015	PHP02	1	2	2	1.75
GossGwas	2	3	69	2015	NC262	1	1	1	1
GossGwas	2	3	70	2015	B70	1	3	3	2.5
GossGwas	2	3	71	2015	B-WHO-201	2	3	3	2.75
GossGwas	2	3	72	2015	B89	1	2	3	2
GossGwas	2	3	73	2015	WXB6	2	3	3	2.75
GossGwas	2	3	74	2015	F39	3	6	6	5.25
GossGwas	2	3	75	2015	89S4125	1	3	3	2.5
GossGwas	2	3	76	2015	R78	1	2	2	1.75
GossGwas	2	3	77	2015	PHW52	2	5	6	4.5
GossGwas	2	4	40	2015	AR214	NA	NA	NA	NA
GossGwas	2	4	41	2015	78002A	1	3	4	2.75
GossGwas	2	4	42	2015	CO256	1	3	3	2.5
GossGwas	2	4	43	2015	N209	2	NA	NA	NA
GossGwas	2	4	44	2015	N201	NA	NA	NA	NA
GossGwas	2	4	45	2015	BEI 10 = NORTH 10	1	1	1	1
GossGwas	2	4	46	2015	PHW79	1	1	1	1
GossGwas	2	4	47	2015	VA18A	2	2	2	2
GossGwas	2	4	48	2015	R181B	4	6	7	5.75
GossGwas	2	4	49	2015	H112	1	1	1	1
GossGwas	2	4	50	2015	AD SA2	NA	NA	NA	NA
GossGwas	2	4	51	2015	T141	1	2	2	1.75
GossGwas	2	4	52	2015	LH194	2	2	2	2
GossGwas	2	4	53	2015	78551S	1	2	3	2
GossGwas	2	4	54	2015	4N506	1	1	1	1
GossGwas	2	4	55	2015	W572	2	5	7	4.75
GossGwas	2	4	56	2015	AD SA12	1	1	1	1
GossGwas	2	4	57	2015	AD 157 DS	3	6	7	5.5
GossGwas	2	4	58	2015	WD456	1	4	5	3.5
GossGwas	2	4	59	2015	N801W	1	1	1	1
GossGwas	2	4	60	2015	N509	1	2	2	1.75
GossGwas	2	4	61	2015	W64A	1	2	3	2
GossGwas	2	4	62	2015	R906	1	3	3	2.5
GossGwas	2	4	63	2015	NC278	1	1	1	1
GossGwas	2	4	64	2015	NC328	1	2	2	1.75
GossGwas	2	4	65	2015	OC12	3	4	4	3.75
GossGwas	2	4	66	2015	GT119	1	2	3	2
GossGwas	2	4	67	2015	LH220HT	3	4	6	4.25
GossGwas	2	4	68	2015	A678	2	3	3	2.75
GossGwas	2	4	69	2015	W8304	1	2	3	2
GossGwas	2	4	70	2015	B73HT	1	3	3	2.5
GossGwas	2	4	71	2015	LP1 CMS HT	4	4	4	4
GossGwas	2	4	72	2015	MS80	1	1	1	1
GossGwas	2	4	73	2015	PHN73	3	4	4	3.75
GossGwas	2	4	74	2015	LH193	1	3	3	2.5
GossGwas	2	4	75	2015	B73HTRHM	1	3	3	2.5
GossGwas	2	4	76	2015	B75	2	1	1	1.25
GossGwas	2	4	77	2015	N200	1	1	1	1
GossGwas	2	5	40	2015	P51	1	2	5	2.5
GossGwas	2	5	41	2015	AD SA7	1	1	1	1
GossGwas	2	5	42	2015	AD SA21	1	1	1	1
GossGwas	2	5	43	2015	B-28	1	3	3	2.5
GossGwas	2	5	44	2015	N552	1	1	1	1
GossGwas	2	5	45	2015	AUSTRCF 306276	1	1	2	1.25
GossGwas	2	5	46	2015	AD 284	3	5	4	4.25
GossGwas	2	5	47	2015	PHN11	2	3	3	2.75
GossGwas	2	5	48	2015	N7A	1	1	1	1
GossGwas	2	5	49	2015	SD63	1	1	1	1
GossGwas	2	5	50	2015	AD SA15	1	1	1	1
GossGwas	2	5	51	2015	NC344	1	1	1	1
GossGwas	2	5	52	2015	A295	2	2	2	2
GossGwas	2	5	53	2015	CML456	3	5	5	4.5
GossGwas	2	5	54	2015	78010	1	1	2	1.25
GossGwas	2	5	55	2015	MO45	3	4	4	3.75
GossGwas	2	5	56	2015	A251	1	1	1	1
GossGwas	2	5	57	2015	N28HT	NA	NA	NA	NA
GossGwas	2	5	58	2015	DAS4	2	3	4	3
GossGwas	2	5	59	2015	NO. 1070 INBRED	2	3	3	2.75
GossGwas	2	5	60	2015	PHG86	1	2	3	2
GossGwas	2	5	61	2015	A636	2	3	4	3
GossGwas	2	5	62	2015	NP87	1	2	2	1.75
GossGwas	2	5	63	2015	MS215	1	1	1	1
GossGwas	2	5	64	2015	B93	1	1	1	1
GossGwas	2	5	65	2015	AD 188L DS	4	4	4	4
GossGwas	2	5	66	2015	LH1	2	2	2	2
GossGwas	2	5	67	2015	AD 363-1	3	3	3	3
GossGwas	2	5	68	2015	B-4541	2	3	3	2.75
GossGwas	2	5	69	2015	AD SA5	3	3	3	3
GossGwas	2	5	70	2015	AD 402 DS	NA	NA	NA	NA
GossGwas	2	5	71	2015	A664	4	6	7	5.75
GossGwas	2	5	72	2015	N523	1	1	1	1
GossGwas	2	5	73	2015	NS701	2	3	3	2.75
GossGwas	2	5	74	2015	N505	3	4	4	3.75
GossGwas	2	5	75	2015	R71	3	5	6	4.75
GossGwas	2	5	76	2015	H45	1	2	3	2
GossGwas	2	5	77	2015	MS71	NA	NA	NA	NA
GossGwas	2	6	40	2015	B73	1	2	3	2
GossGwas	2	6	41	2015	H109	1	1	1	1
GossGwas	2	6	42	2015	VA35	1	1	1	1
GossGwas	2	6	43	2015	IA DS 53	3	5	5	4.5
GossGwas	2	6	44	2015	AD SA19	2	3	3	2.75
GossGwas	2	6	45	2015	H49	1	1	1	1
GossGwas	2	6	46	2015	R109B	1	1	1	1
GossGwas	2	6	47	2015	NC372	1	1	1	1
GossGwas	2	6	48	2015	DE1	1	1	1	1
GossGwas	2	6	49	2015	M14	1	1	1	1
GossGwas	2	6	50	2015	OC16	NA	NA	NA	NA
GossGwas	2	6	51	2015	LH38	2	3	3	2.75
GossGwas	2	6	52	2015	AD H10	NA	NA	NA	NA
GossGwas	2	6	53	2015	IB014	3	3	3	3
GossGwas	2	6	54	2015	89S4157	1	2	3	2
GossGwas	2	6	55	2015	H100	3	4	4	3.75
GossGwas	2	6	56	2015	CH157	1	2	4	2.25
[truncated: 941 more rows]
